# Supplementary material
Source: ML conference proceedings conference paper supplement (https://openreview.net/forum?id=yMf3SLah5-y)
Supplement: supplementary_material [file attachment]

# Appendix

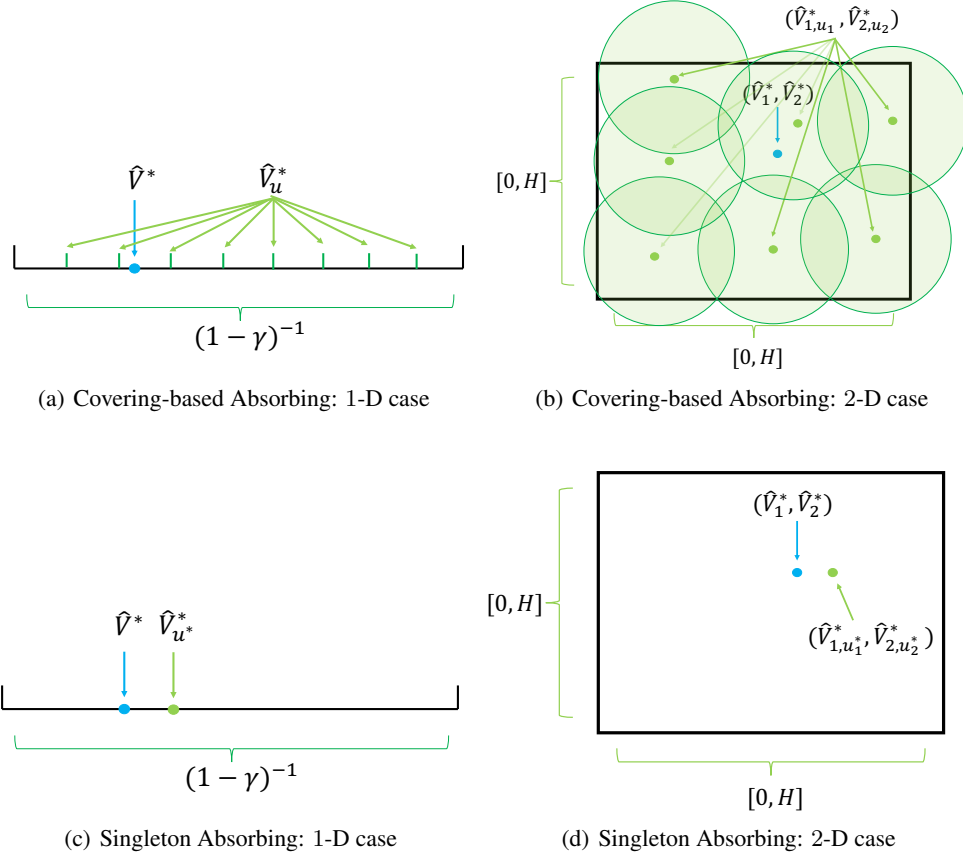

Figure 2: Visualization of singleton absorbing MDP technique

We provide a visualization (Figure 2) for understanding the *singleton absorbing MDP* technique at the beginning of Appendix. 2(a), 2(c) demonstrate the infinite horizon case and 2(b), 2(d) demonstrate the finite horizon case. In particular, it should be a  $H$ -dimensional hypercube  $[0, H]^H$  (that contains  $\widehat{V}_1^*, \dots, \widehat{V}_h^*$ ) instead of only the square  $[0, H] \times [0, H]$  ( $\widehat{V}_1^*, \widehat{V}_2^*$ ). This is only for the ease of visualization.

The standard absorbing MDP technique Agarwal et al. [2020], Cui and Yang [2020] leverages a set of absorbing MDPs to cover the range of value functions (following the standard covering principle) to make sure  $\widehat{V}^*$  is close to one of the element (absorbing MDP) in the set (Figure 2(a), 2(b)). The size of the covering set (*i.e.* the covering number) grows exponentially in  $H$  2(b) in the finite horizon setting and this is due to the fact that there are  $\widehat{V}_1^*, \widehat{V}_2^*, \dots, \widehat{V}_H^*$  quantities to cover. This results in the metric entropy (the log of the covering number) to blow up by a factor of  $H$  and incurs suboptimality. On the other hand, by the nifty chosen singleton absorbing MDP  $\widehat{V}_{h,u^*}^*$  (Figure 2(c), 2(d)), we completely get rid of the covering issue (covering the  $H$ -dimensional space requires exponential in  $H$  size), maintain the independence and control the error propagation ( $\|\widehat{V}^* - \widehat{V}_{u^*}^*\|_\infty$  is sufficiently small). See Section B for all the technical details.

## A Discussion on Related works

**Offline reinforcement learning.** Information-theoretical considerations for offline RL are first proposed for *infinite horizon discounted setting* via Fitted Q-Iteration (FQI) type function approximation

algorithms [Chen and Jiang, 2019, Le et al., 2019, Xie and Jiang, 2021, 2020] which can be traced back to [Munos, 2003, Szepesvári and Munos, 2005, Antos et al., 2008a,b]. Later, Xie and Jiang [2021] considers the offline RL under only the *realizability* assumption and Liu et al. [2020b] considers the offline RL *without good exploration*. Those are all challenging problems but with they only provide suboptimal polynomial complexity in terms of  $(1 - \gamma)^{-1}$ .

For the finite horizon case, Yin et al. [2021a] first achieves  $\tilde{O}(H^3/d_m\epsilon^2)$  complexity under non-stationary transition but their results cannot be further improved in the stationary setting. Concurrent to our work, a recently released work Yin et al. [2021b] designs the offline variance reduction algorithm for achieving the optimal  $\tilde{O}(H^2/d_m\epsilon^2)$  rate. Their result is for a specific algorithm that uses data splitting while our results work for any algorithms that returns a nearly empirically optimal policy via a uniform convergence guarantee. Our results on the offline task-agnostic and the reward-free settings are entirely new. Another concurrent work Ren et al. [2021] considers the horizon-free setting but does not provide uniform convergence guarantee. Even more recently, Rashidinejad et al. [2021] considers the single concentrability coefficient  $C^* := \max_{s,a} \frac{d^{\pi^*}(s,a)}{d^\mu(s,a)}$  and obtains the sample complexity  $\tilde{O}[(1 - \gamma)^{-5}SC^*/\epsilon^2]$ . Concurrently, Yin and Wang [2021] first derives the instance-dependent offline RL bounds, but their result is for time-inhomogeneous MDPs.

In the linear MDP case, Jin et al. [2020c] studies the pessimism-based algorithms for offline policy optimization under the weak compliance assumption and Wang et al. [2021], Zanette [2021] provide some negative results (exponential lower bound) for offline RL with linear MDP structure.

**Model-based approaches with minimaxity.** It is known model-based methods are minimax-optimal for online RL with regret  $\tilde{O}(\sqrt{HSAT})$  (e.g. Azar et al. [2017], Efroni et al. [2019]). For linear MDP, In the generative model setting, Agarwal et al. [2020] shows model-based approach is still minimax optimal  $\tilde{O}((1 - \gamma)^{-3}SA/\epsilon^2)$  by using a  $s$ -absorbing MDP construction and this model-based technique is later reused for other more general settings (e.g. Markov games [Zhang et al., 2020a] and linear MDPs [Cui and Yang, 2020]) and also for improving the sample size barrier [Li et al., 2020]. In offline RL, Yu et al. [2020], Kidambi et al. [2020] use model-based approaches for continuous policy optimization and Yin et al. [2021a] uses the model-based methods to achieve  $\tilde{O}(H^3/d_m\epsilon^2)$  complexity.

**Task-agnostic and Reward-free problems.** The reward-free problem is initiated in the online RL [Jin et al., 2020a] where the agent needs to efficiently explore an MDP environment *without* using any reward information. It requires high probability guarantee for learning optimal policy for *any* reward function, which is strictly stronger than the standard learning task that one only needs to learn to optimal policy for a fixed reward. Later, Kaufmann et al. [2020], Menard et al. [2020] establish the  $\tilde{O}(H^3S^2A/\epsilon^2)$  complexity and Zhang et al. [2020c] further tightens the dependence to  $\tilde{O}(H^2S^2A/\epsilon^2)$ .<sup>9</sup> Recently, Zhang et al. [2020b] proposes the task-agnostic setting where one needs to use exploration data to simultaneously learn  $K$  tasks and provides a upper bound with complexity  $\tilde{O}(H^5SA \log(K)/\epsilon^2)$ . For linear MDP setting, Wang et al. [2020] achieves the sample complexity  $\tilde{O}(d^3H^6/\epsilon^2)$  and Liu et al. [2020a] considers such problem in the online two-player Markov game. However, although these settings remain critical in the offline regime, no statistical result has been formally derived so far.

## B Proof of optimal local uniform convergence

### B.1 Model-based Offline Plug-in Estimator

Recall the model-based estimator uses empirical estimator  $\hat{P}$  for estimating  $P$  and the estimator is calculated accordingly:

$$\hat{Q}_h^\pi = r + \hat{P}^{\pi_{h+1}} Q_{h+1}^\pi = r + \hat{P} V_{H+1}^\pi,$$

where  $\hat{P}(s'|s, a)$  can be expressed as:

<sup>9</sup>We translate [Zhang et al., 2020c] their dimension-free result to  $\tilde{O}(H^2S^2A/\epsilon^2)$  under the standard assumption  $r \in [0, 1]$ .

$$\widehat{P}(s'|s, a) = \frac{\sum_{i=1}^n \sum_{h=1}^H \mathbf{1}[(s_{h+1}^{(i)}, a_h^{(i)}, s_h^{(i)}) = (s', s, a)]}{n_{s,a}}, \quad n_{s,a} = \sum_{h=1}^H \sum_{i=1}^n \mathbf{1}[(s_h^{(i)}, a_h^{(i)}) = (s, a)].$$

and  $\widehat{P}(s'|s, a) = \frac{1}{S}$ , if  $n_{s,a} = 0$ . The initial distribution is also constructed as  $\widehat{d}_1^\pi(s) = n_s/n$ .

First of all, we have by definition the Bellman optimality equation

$$V_t^*(s) = \max_a \left\{ r(s, a) + \sum_{s'} P(s'|s, a) V_{t+1}^*(s') \right\}, \quad \forall s \in \mathcal{S}. \quad (3)$$

and similarly the empirical version

$$\widehat{V}_t^*(s) = \max_a \left\{ r(s, a) + \sum_{s'} \widehat{P}(s'|s, a) \widehat{V}_{t+1}^*(s') \right\}, \quad \forall s \in \mathcal{S}.$$

The key difficulty in obtaining the optimal dependence in stationary setting is decoupling the dependence of  $P - \widehat{P}$  and  $\widehat{V}^*$ . This issue is not encountered in the non-stationary setting due to the possibility to estimate different transition at each time [Yin et al., 2021a], but it cannot further reduce the sample complexity on  $H$ . Moreover, the direct use of  $s$ -absorbing MDP in Agarwal et al. [2020] is not sharp for finite horizon stationary setting, as it requires  $s$ -absorbing MDPs with  $H$ -dimensional cover (which has size  $\approx e^H$  and it is not optimal). We design the *singleton-absorbing MDP* to get rid of the issue.

## B.2 General absorbing MDP

The general absorbing MDP is defined as follows: for a fixed state  $s$  and a sequence  $\{u_t\}_{t=1}^H$ , MDP  $M_{s, \{u_t\}_{t=1}^H}$  is identical to  $M$  for all states except  $s$ , and state  $s$  is absorbing in the sense  $P_{M_{s, \{u_t\}_{t=1}^H}}(s|s, a) = 1$  for all  $a$ , and the instantaneous reward at time  $t$  is  $r_t(s, a) = u_t$  for all  $a \in \mathcal{A}$ . Also, we use the shorthand notation  $V_{\{s, u_t\}}^\pi$  for  $V_{s, M_{s, \{u_t\}_{t=1}^H}}^\pi$  and similarly for  $Q_{\{s, u_t\}}$  and transition  $P_{\{s, u_t\}}$ . Then the following properties hold:

**Lemma B.1.**

$$V_{h, \{s, u_t\}}^*(s) = \sum_{t=h}^H u_t.$$

*Proof.* We prove by backward induction. For  $h = H$ , under  $M_{s, \{u_t\}_{t=1}^H}$  state  $s$  is absorbing (and by convention  $V_{H+1, \{s, u_t\}}^* = 0$ ) therefore

$$V_{H, \{s, u_t\}}^*(s) = \max_a \left\{ r_{H, \{s, u_t\}}(s, a) + \sum_{s'} P_{\{s, u_t\}}(s'|s, a) V_{H+1, \{s, u_t\}}^*(s') \right\} = \max_a \{ r_{H, \{s, u_t\}}(s, a) \} = u_H$$

for general  $h$ , note  $\sum_{s'} P_{\{s, u_t\}}(s'|s, a) V_{h+1, \{s, u_t\}}^*(s') = 1 \cdot V_{h+1, \{s, u_t\}}^*(s)$ , therefore using induction property  $V_{h+1, \{s, u_t\}}^*(s) = \sum_{t=h+1}^H u_t$  we can similarly obtain  $V_{h, \{s, u_t\}}^*(s) = \sum_{t=h}^H u_t$ . ■

**Lemma B.2.** Fix state  $s$ . For two different sequences  $\{u_t\}_{t=1}^H$  and  $\{u'_t\}_{t=1}^H$ , we have

$$\max_h \left\| Q_{h, \{s, u_t\}}^* - Q_{h, \{s, u'_t\}}^* \right\|_\infty \leq H \cdot \max_{t \in [H]} |u_t - u'_t|.$$

*Proof.* Let  $\pi_{\{s,u_t\}}^*$  be the optimal policy in  $M_{\{s,u_t\}}$ . Then (by convention  $\prod_{a=h+1}^h P^{\pi_a} = I$ )

$$\begin{aligned}
Q_{h,\{s,u_t\}}^* - Q_{h,\{s,u'_t\}}^* &= Q_{h,\{s,u_t\}}^* - \max_{\pi} \sum_{i=h}^H \left( \prod_{a=h+1}^i P_{\{s,u'_t\}}^{\pi_a} \right) r_{i,\{s,u'_t\}} \\
&\leq Q_{h,\{s,u_t\}}^* - \sum_{i=h}^H \left( \prod_{a=h+1}^i P_{\{s,u'_t\}}^{\pi_{a,\{s,u_t\}}^*} \right) r_{i,\{s,u'_t\}} = \sum_{i=h}^H \left( \prod_{a=h+1}^i P_{\{s,u'_t\}}^{\pi_{a,\{s,u_t\}}^*} \right) (r_{i,\{s,u_t\}} - r_{i,\{s,u'_t\}}) \\
&\leq \sum_{i=h}^H \max_{s,a} \left\| \left( \prod_{a=h+1}^i P_{\{s,u'_t\}}^{\pi_{a,\{s,u_t\}}^*} \right)^{i-h} (\cdot|s,a) \right\|_1 \cdot \|r_{i,\{s,u_t\}} - r_{i,\{s,u'_t\}}\|_{\infty} \cdot \mathbf{1} = (H-h+1) \cdot \max_t |u_t - u'_t| \cdot \mathbf{1}
\end{aligned}$$

where the first equal sign uses the definition of  $Q^*$ , the second equal sign uses  $P_{\{s,u_t\}}$  only depends  $s$  but not the specification of  $u_t$ 's and the last equal sign comes from  $r_{i,\{s,u_t\}}(s,a) = u_i$  for any  $a \in \mathcal{A}$  and  $r_{i,\{s,u_t\}}(\tilde{s},a) = r_{i,\{s,u'_t\}}(\tilde{s},a)$  for any  $\tilde{s} \neq s$ . Lastly by symmetry we finish the proof.  $\blacksquare$

### B.3 Singleton-absorbing MDP

The direct of transfer of absorbing technique created in Agarwal et al. [2020] will require each  $u_t$  to fill in the range of  $[0, H]$  using evenly spaced elements. For finite horizon MDP there are  $H$  layers, therefore the total number of  $H$ -tuples  $(u_1, \dots, u_H)$  has order  $|U_s| = \text{Poly}(H)^H$ , therefore when apply the union bound, it will incur the additional  $H$  factor. We get rid of this issue by choosing one single point in  $H$ -dimensional space  $[0, H]^H$ . We first give the following two lemmas.

**Lemma B.3.**  $V_t^*(s) - V_{t+1}^*(s) \geq 0$ , for all state  $s \in \mathcal{S}$  and all  $t \in [H]$ .

*Proof.* Let the optimal policy for  $V_{t+1}^*$  be  $\pi_{t+1:H}^*$ , i.e.  $V_{t+1}^* = V_{t+1}^{\pi_{t+1:H}^*}$ , then artificially construct a policy  $\pi_{t:H}$  such that  $\pi_{t:H-1} = \pi_{t+1:H}^*$  and  $\pi_H$  is arbitrary, then by the definition of optimal value

$$\begin{aligned}
V_t^*(s) &\geq V_t^{\pi_{t:H}}(s) = \mathbb{E}^{\pi_{t:H}} \left[ \sum_{i=t}^H r(s_i, a_i) \mid s_t = s \right] \\
&= \mathbb{E}^{\pi_{t:H-1}} \left[ \sum_{i=t}^{H-1} r(s_i, a_i) \mid s_t = s \right] + \mathbb{E}^{\pi_{t:H}} [r(s_H, a_H) \mid s_t = s] \\
&= \mathbb{E}^{\pi_{t+1:H}^*} \left[ \sum_{i=t+1}^H r(s_i, a_i) \mid s_{t+1} = s \right] + \mathbb{E}^{\pi_{t:H}} [r(s_H, a_H) \mid s_t = s] \\
&\geq \mathbb{E}^{\pi_{t+1:H}^*} \left[ \sum_{i=t+1}^H r(s_i, a_i) \mid s_{t+1} = s \right] + 0 = V_{t+1}^*(s),
\end{aligned}$$

where the third equal sign uses exactly that  $P$  is a *STATIONARY* transition and definition  $\pi_{t:H-1} = \pi_{t+1:H}^*$ . The last inequality uses assumption that reward is always non-negative.  $\blacksquare$

**Remark B.4.** Lemma B.3 leverages  $P$  is stationary and above may not be true in the non-stationary setting. This enables us to establish the following lemma, which is the key for singleton-absorbing MDP.

**Lemma B.5.** Fix a state  $s$ . If we choose  $u_t^* := V_t^*(s) - V_{t+1}^*(s) \forall t \in [H]$ , then we have the following vector form equation

$$V_{h,\{s,u_t^*\}}^* = V_{h,M}^* \quad \forall h \in [H].$$

Similarly, if we choose  $\hat{u}_t^* := \hat{V}_t^*(s) - \hat{V}_{t+1}^*(s)$ , then  $\hat{V}_{h,\{\hat{u}_t^*\}}^* = \hat{V}_{h,M}^*, \forall h \in [H]$ .

*Proof.* We focus on the first claim. Note by Lemma B.3 the assignment of  $u_t^* := r_{t,\{s,u_t^*\}}$  is well-defined. Next recall  $V_{h,M}^*$  is the optimal value under true MDP  $M$  and  $V_{h,\{s,u_t^*\}}^*$  is the optimal value under the assimilating MDP  $M_{s,\{u_t^*\}_{t=1}^H}$ . We prove by backward induction.

For  $h = H$ , note by convention  $V_{H+1}^* = 0$ , therefore  $u_H^* = V_H^*(s) - V_{H+1}^*(s) = V_H^*(s) - 0 = V_H^*(s)$  and Bellman optimality equation becomes

$$V_H^*(\tilde{s}) = \max_a \{r(\tilde{s}, a)\}, \quad \forall \tilde{s} \in \mathcal{S}.$$

Under  $M_{s, \{u_t^*\}_{t=1}^H}$ , for state  $s$  by Lemma B.1 we have  $V_{H, \{s, u_t^*\}}^*(s) = u_H^* = V_H^*(s)$ , for other states  $\tilde{s} \neq s$ , reward in  $M_{s, \{u_t^*\}_{t=1}^H} = M$  so we also have  $V_{H, \{s, u_t^*\}}^*(\tilde{s}) = V_H^*(\tilde{s})$  for all  $\tilde{s} \neq s$ .

Now for general  $h$ , for state  $s$  by Lemma B.1

$$V_{h, \{s, u_t^*\}}^*(s) = \sum_{t=h}^H u_t^* = \sum_{t=h}^H (V_t^*(s) - V_{t+1}^*(s)) = V_h^*(s),$$

for state  $\tilde{s} \neq s$ , by Bellman optimality equation

$$\begin{aligned} V_{h, \{s, u_t^*\}}^*(\tilde{s}) &= \max_a \left\{ r_{\{s, u_t^*\}}(\tilde{s}, a) + \sum_{s'} P_{\{s, u_t^*\}}(s' | \tilde{s}, a) V_{h+1, \{s, u_t^*\}}^*(s') \right\} \\ &= \max_a \left\{ r(\tilde{s}, a) + \sum_{s'} P(s' | \tilde{s}, a) V_{h+1, \{s, u_t^*\}}^*(s') \right\} \\ &= \max_a \left\{ r(\tilde{s}, a) + \sum_{s'} P(s' | \tilde{s}, a) V_{h+1}^*(s') \right\} = V_h^*(\tilde{s}), \end{aligned}$$

where the second equal sign uses when  $\tilde{s} \neq s$ ,  $M_{s, \{u_t^*\}_{t=1}^H}$  is identical to  $M$  and the third equal sign uses induction assumption that element-wisely  $V_{h+1, \{s, u_t^*\}}^* = V_{h+1}^*$ . Similar result can be derived for  $\hat{u}^*$  version and this completes the proof. ■

The singleton MDP we used is exactly  $M_{s, \{u_t^*\}_{t=1}^H}$  (or  $\widehat{M}_{s, \{u_t^*\}_{t=1}^H}$ ).

#### B.4 Proof for local uniform convergence

Recall the local policy class

$$\Pi_l := \left\{ \pi : \text{s.t. } \left\| \widehat{V}_h^\pi - \widehat{V}_h^{\widehat{\pi}^*} \right\|_\infty \leq \epsilon_{\text{opt}}, \forall h \in [H] \right\}.$$

For ease of exposition, we denote  $N := \min_{s,a} n_{s,a}$ . Note  $N$  itself is a random variable, therefore for the rest of proof we first conditional on  $N$ . Later we shall remove the conditional on  $N$  (see Section B.7).

For any  $\widehat{\pi} \in \Pi_l$ , by (empirical) Bellman equation we have element-wisely:

$$\begin{aligned} \widehat{Q}_h^{\widehat{\pi}} - Q_h^{\widehat{\pi}} &= r_h + \widehat{P}^{\widehat{\pi}_{h+1}} \widehat{Q}_{h+1}^{\widehat{\pi}} - r_h - P^{\widehat{\pi}_{h+1}} Q_{h+1}^{\widehat{\pi}} \\ &= \left( \widehat{P}^{\widehat{\pi}_{h+1}} - P^{\widehat{\pi}_{h+1}} \right) \widehat{Q}_{h+1}^{\widehat{\pi}} + P^{\widehat{\pi}_{h+1}} \left( \widehat{Q}_{h+1}^{\widehat{\pi}} - Q_{h+1}^{\widehat{\pi}} \right) \\ &= \left( \widehat{P} - P \right) \widehat{V}_{h+1}^{\widehat{\pi}} + P^{\widehat{\pi}_{h+1}} \left( \widehat{Q}_{h+1}^{\widehat{\pi}} - Q_{h+1}^{\widehat{\pi}} \right) \\ &= \dots = \sum_{t=h}^H \Gamma_{h+1:t}^{\widehat{\pi}} \left( \widehat{P} - P \right) \widehat{V}_{t+1}^{\widehat{\pi}} \\ &\leq \underbrace{\sum_{t=h}^H \Gamma_{h+1:t}^{\widehat{\pi}} \left| \left( \widehat{P} - P \right) \widehat{V}_{t+1}^{\widehat{\pi}} \right|}_{(\star)} + \underbrace{\sum_{t=h}^H \Gamma_{h+1:t}^{\widehat{\pi}} \left| \left( \widehat{P} - P \right) \left( \widehat{V}_{t+1}^{\widehat{\pi}} - \widehat{V}_{t+1}^{\widehat{\pi}^*} \right) \right|}_{(\star\star)} \end{aligned}$$

where  $\Gamma_{h+1:t}^{\widehat{\pi}} = \prod_{i=h+1}^t P^{\widehat{\pi}_i}$  is multi-step state-action transition and  $\Gamma_{h+1:h} := I$ .

## B.5 Analyzing (\*\*)

Term (\*\*) can be readily bounded using the following lemma.

**Lemma B.6.** Fix  $N > 0$ , we have with probability  $1 - \delta$ , for all  $t = 1, \dots, H - 1$

$$\sum_{t=h}^H \Gamma_{h+1:t}^{\hat{\pi}} \left| (\hat{P} - P)(\hat{V}_{h+1}^{\hat{\pi}^*} - \hat{V}_{h+1}^{\hat{\pi}}) \right| \leq C \epsilon_{\text{opt}} \cdot \sqrt{\frac{H^2 S \log(SA/\delta)}{N}} \cdot \mathbf{1}$$

where  $C$  absorb the higher order term and absolute constants.

*Proof.* First, by vector induced matrix norm<sup>10</sup> we have

$$\begin{aligned} \left\| \sum_{t=h}^H \Gamma_{h+1:t}^{\hat{\pi}} \cdot (\hat{P} - P)(\hat{V}_{t+1}^{\hat{\pi}^*} - \hat{V}_{t+1}^{\hat{\pi}}) \right\|_{\infty} &\leq H \cdot \sup_t \left\| \Gamma_{h+1:t}^{\hat{\pi}} \right\|_{\infty} \left\| (\hat{P} - P)(\hat{V}_{t+1}^{\hat{\pi}^*} - \hat{V}_{t+1}^{\hat{\pi}}) \right\|_{\infty} \\ &\leq H \cdot \sup_t \left\| (\hat{P} - P)(\hat{V}_{t+1}^{\hat{\pi}^*} - \hat{V}_{t+1}^{\hat{\pi}}) \right\|_{\infty} \\ &= H \cdot \sup_{t,s,a} \left| (\hat{P} - P)(\cdot|s, a)(\hat{V}_{t+1}^{\hat{\pi}^*} - \hat{V}_{t+1}^{\hat{\pi}}) \right| \\ &\leq H \cdot \sup_{t,s,a} \left\| (\hat{P} - P)(\cdot|s, a) \right\|_1 \cdot \left\| \hat{V}_{t+1}^{\hat{\pi}^*} - \hat{V}_{t+1}^{\hat{\pi}} \right\|_{\infty} \cdot \mathbf{1} \end{aligned}$$

where the second inequality uses multi-step transition  $\Gamma_{t+1:h-1}^{\pi}$  is row-stochastic. Note given  $N$ , therefore by Lemma J.9 and a union bound we have with probability  $1 - \delta$ ,

$$\sup_{s,a} \left\| (\hat{P} - P)(\cdot|s, a) \right\|_1 \leq C \left( \sqrt{\frac{S \log(SA/\delta)}{N}} \right),$$

(where  $C$  absorb the higher order term and absolute constants) and using definition of  $\Pi_l$  we have

$\sup_t \left\| \hat{V}_t^{\hat{\pi}^*} - \hat{V}_t^{\hat{\pi}} \right\|_{\infty} \leq \epsilon_{\text{opt}}$ . This indicates

$$\sup_{t,s,a} \left\| (\hat{P} - P)(\cdot|s, a) \right\|_1 \cdot \left\| \hat{V}_{t+1}^{\hat{\pi}^*} - \hat{V}_{t+1}^{\hat{\pi}} \right\|_{\infty} \cdot \mathbf{1} \leq C(\epsilon_{\text{opt}} \sqrt{\frac{S \log(SA/\delta)}{N}} \cdot \mathbf{1}),$$

where  $\mathbf{1} \in \mathbb{R}^S$  is all-one vector. Then multiple by  $H$  to get the stated result. ■

## B.6 Analyzing (\*)

**Concentration on  $(\hat{P} - P) \hat{V}_h^*$ .**<sup>11</sup> Since  $\hat{P}$  aggregates all data from different step so that  $\hat{P}$  and  $\hat{V}_h^*$  are on longer independent, Bernstein inequality cannot be directly applied. We use the singleton-absorbing MDP  $M_{s, \{u_t^*\}_{t=1}^H}$  to handle the case (recall  $u_t^* := V_t^*(s) - V_{t+1}^*(s) \forall t \in [H]$ ). Again, let us fix a state  $s$  and  $a \in \mathcal{A}$  be any action. Also, we use  $P_{s,a}$  to denote row vector to avoid long

<sup>10</sup>For  $A$  a matrix and  $x$  a vector we have  $\|Ax\|_{\infty} \leq \|A\|_{\infty} \|x\|_{\infty}$ .

<sup>11</sup>Here we use  $\hat{V}_h^*$  instead of  $\hat{V}_t^*$  since we later have  $\hat{V}_{h, \{s, u_t^*\}}^*$ . We avoid the same  $t$  twice in the expression to prevent confusion.

expression. Then we have:

$$\begin{aligned}
& (\widehat{P}_{s,a} - P_{s,a}) \widehat{V}_h^* = (\widehat{P}_{s,a} - P_{s,a}) \left( \widehat{V}_h^* - \widehat{V}_{h,\{s,u_t^*\}}^* + \widehat{V}_{h,\{s,u_t^*\}}^* \right) \\
& = (\widehat{P}_{s,a} - P_{s,a}) \left( \widehat{V}_h^* - \widehat{V}_{h,\{s,u_t^*\}}^* \right) + (\widehat{P}_{s,a} - P_{s,a}) \widehat{V}_{h,\{s,u_t^*\}}^* \\
& \leq \left\| \widehat{P}_{s,a} - P_{s,a} \right\|_1 \left\| \widehat{V}_h^* - \widehat{V}_{h,\{s,u_t^*\}}^* \right\|_\infty + \sqrt{\frac{2 \log(4/\delta)}{N}} \sqrt{\text{Var}_{s,a}(\widehat{V}_{h,\{s,u_t^*\}}^*)} + \frac{2H \log(1/\delta)}{3N} \\
& \leq \left\| \widehat{P}_{s,a} - P_{s,a} \right\|_1 \left\| \widehat{V}_h^* - \widehat{V}_{h,\{s,u_t^*\}}^* \right\|_\infty + \sqrt{\frac{2 \log(4/\delta)}{N}} \left( \sqrt{\text{Var}_{s,a}(\widehat{V}_h^*)} + \sqrt{\text{Var}_{s,a}(\widehat{V}_{h,\{s,u_t^*\}}^* - \widehat{V}_h^*)} \right) + \frac{2H \log(1/\delta)}{3N} \\
& \leq \left\| \widehat{P}_{s,a} - P_{s,a} \right\|_1 \left\| \widehat{V}_h^* - \widehat{V}_{h,\{s,u_t^*\}}^* \right\|_\infty + \sqrt{\frac{2 \log(4/\delta)}{N}} \left( \sqrt{\text{Var}_{s,a}(\widehat{V}_h^*)} + \sqrt{\left\| \widehat{V}_{h,\{s,u_t^*\}}^* - \widehat{V}_h^* \right\|_\infty^2} \right) + \frac{2H \log(1/\delta)}{3N} \\
& = \left( \left\| \widehat{P}_{s,a} - P_{s,a} \right\|_1 + \sqrt{\frac{2 \log(4/\delta)}{N}} \right) \left\| \widehat{V}_h^* - \widehat{V}_{h,\{s,u_t^*\}}^* \right\|_\infty + \sqrt{\frac{2 \log(4/\delta)}{N}} \sqrt{\text{Var}_{s,a}(\widehat{V}_h^*)} + \frac{2H \log(1/\delta)}{3N}
\end{aligned} \tag{4}$$

where the first inequality uses Bernstein inequality (Lemma J.3), the second inequality uses  $\sqrt{\text{Var}(\cdot)}$  is norm (norm triangle inequality). Now we treat  $\left\| \widehat{P}_{s,a} - P_{s,a} \right\|_1$  and  $\left\| \widehat{V}_h^* - \widehat{V}_{h,\{s,u_t^*\}}^* \right\|_\infty$  separately.

**For**  $\left\| \widehat{P}_{s,a} - P_{s,a} \right\|_1$ . Indeed, by Lemma J.9 again  $\left\| \widehat{P}_{s,a} - P_{s,a} \right\|_1 \leq \tilde{O}\left(\sqrt{\frac{S \log(S/\delta)}{N}}\right)$  and by a union bound we obtain w.p.,  $1 - \delta$

$$\sup_{s,a} \left\| \widehat{P}_{s,a} - P_{s,a} \right\|_1 \leq C \sqrt{\frac{S \log(SA/\delta)}{N}}. \tag{5}$$

where  $C$  absorbs the higher order term and constants.

**For**  $\left\| \widehat{V}_h^* - \widehat{V}_{h,\{s,u_t^*\}}^* \right\|_\infty$ . Note if we set  $\widehat{u}_t^* = \widehat{V}_t^*(s) - \widehat{V}_{t+1}^*(s)$ , then by Lemma B.5

$$\widehat{V}_h^* = \widehat{V}_{h,\{s,\widehat{u}_t^*\}}^*$$

Next since  $\widehat{V}_{h,\{s,\widehat{u}_t^*\}}^*(\tilde{s}) = \max_a \widehat{Q}_{h,\{s,\widehat{u}_t^*\}}^*(\tilde{s}, a) \forall \tilde{s} \in \mathcal{S}$ , by generic inequality  $|\max f - \max g| \leq \max |f - g|$ , we have  $|\widehat{V}_{h,\{s,\widehat{u}_t^*\}}^*(\tilde{s}) - \widehat{V}_{h,\{s,u_t^*\}}^*(\tilde{s})| \leq \max_a |\widehat{Q}_{h,\{s,\widehat{u}_t^*\}}^*(\tilde{s}, a) - \widehat{Q}_{h,\{s,u_t^*\}}^*(\tilde{s}, a)|$ , taking  $\max_{\tilde{s}}$  on both sides, we obtain exactly

$$\left\| \widehat{V}_{h,\{s,\widehat{u}_t^*\}}^* - \widehat{V}_{h,\{s,u_t^*\}}^* \right\|_\infty \leq \left\| \widehat{Q}_{h,\{s,\widehat{u}_t^*\}}^* - \widehat{Q}_{h,\{s,u_t^*\}}^* \right\|_\infty$$

then by Lemma B.2,

$$\left\| \widehat{V}_h^* - \widehat{V}_{h,\{s,u_t^*\}}^* \right\|_\infty \leq \left\| \widehat{Q}_{h,\{s,\widehat{u}_t^*\}}^* - \widehat{Q}_{h,\{s,u_t^*\}}^* \right\|_\infty \leq H \max_t |\widehat{u}_t^* - u_t^*|, \tag{6}$$

Recall

$$\widehat{u}_t^* - u_t^* = \widehat{V}_t^*(s) - \widehat{V}_{t+1}^*(s) - (V_t^*(s) - V_{t+1}^*(s)).$$

Now we denote

$$\Delta_s := \max_t |\widehat{u}_t^* - u_t^*| = \max_t \left| \widehat{V}_t^*(s) - \widehat{V}_{t+1}^*(s) - (V_t^*(s) - V_{t+1}^*(s)) \right|,$$

then  $\Delta_s$  itself is a scalar and a random variable.

To sum up, by (4), (5) and (6) and a union bound we have

**Lemma B.7.** Fix  $N > 0$ . With probability  $1 - \delta$ , element-wisely, for all  $h \in [H]$ ,

$$\left| (\widehat{P} - P) \widehat{V}_h^* \right| \leq C \sqrt{\frac{S \log(HSA/\delta)}{N}} \cdot H \max_s \Delta_s \cdot \mathbf{1} + \sqrt{\frac{2 \log(4HSA/\delta)}{N}} \sqrt{\text{Var}_P(\widehat{V}_h^*)} + \frac{2H \log(HSA/\delta)}{3N} \cdot \mathbf{1}$$

Now plug Lemma B.7 back into (\*) and combine Lemma B.6, we receive:

$$\begin{aligned}
& \left| \widehat{Q}_h^{\widehat{\pi}} - Q_h^{\widehat{\pi}} \right| \\
& \leq \sum_{t=h}^H \Gamma_{h+1:t}^{\widehat{\pi}} \left( C \sqrt{\frac{S \log(HSA/\delta)}{N}} \cdot H \max_s \Delta_s \cdot \mathbf{1} + \sqrt{\frac{2 \log(4HSA/\delta)}{N}} \sqrt{\text{Var}_P(\widehat{V}_{t+1}^*)} + \frac{2H \log(HSA/\delta)}{3N} \cdot \mathbf{1} \right) \\
& + C \epsilon_{\text{opt}} \cdot \sqrt{\frac{H^2 S \log(SA/\delta)}{N}} \cdot \mathbf{1} \\
& \leq \sum_{t=h}^H \Gamma_{h+1:t}^{\widehat{\pi}} \sqrt{\frac{2 \log(4HSA/\delta)}{N}} \sqrt{\text{Var}_P(\widehat{V}_{t+1}^*)} + CH^2 \sqrt{\frac{S \log(HSA/\delta)}{N}} \cdot \max_s \Delta_s \cdot \mathbf{1} + \frac{2H^2 \log(HSA/\delta)}{3N} \cdot \mathbf{1} \\
& + C \epsilon_{\text{opt}} \cdot \sqrt{\frac{H^2 S \log(SA/\delta)}{N}} \cdot \mathbf{1}
\end{aligned}$$

Next note

$$\begin{aligned}
& \sqrt{\text{Var}_P(\widehat{V}_h^*)} := \sqrt{\text{Var}_P(\widehat{V}_h^{\widehat{\pi}^*})} = \sqrt{\text{Var}_P(\widehat{V}_h^{\widehat{\pi}^*} - \widehat{V}_h^{\widehat{\pi}} + \widehat{V}_h^{\widehat{\pi}})} \\
& \leq \sqrt{\text{Var}_P(\widehat{V}_h^{\widehat{\pi}})} + \sqrt{\text{Var}_P(\widehat{V}_h^{\widehat{\pi}^*} - \widehat{V}_h^{\widehat{\pi}})} \leq \sqrt{\text{Var}_P(\widehat{V}_h^{\widehat{\pi}})} + \left\| \widehat{V}_h^{\widehat{\pi}^*} - \widehat{V}_h^{\widehat{\pi}} \right\|_{\infty} \\
& \leq \sqrt{\text{Var}_P(\widehat{V}_h^{\widehat{\pi}})} + \epsilon_{\text{opt}} \cdot \mathbf{1} \leq \sqrt{\text{Var}_P(V_h^{\widehat{\pi}})} + \sqrt{\text{Var}_P(\widehat{V}_h^{\widehat{\pi}} - V_h^{\widehat{\pi}})} + \epsilon_{\text{opt}} \cdot \mathbf{1} \\
& \leq \sqrt{\text{Var}_P(V_h^{\widehat{\pi}})} + \left\| \widehat{V}_h^{\widehat{\pi}} - V_h^{\widehat{\pi}} \right\|_{\infty} + \epsilon_{\text{opt}} \cdot \mathbf{1} \leq \sqrt{\text{Var}_P(V_h^{\widehat{\pi}})} + \left\| \widehat{Q}_h^{\widehat{\pi}} - Q_h^{\widehat{\pi}} \right\|_{\infty} + \epsilon_{\text{opt}} \cdot \mathbf{1}
\end{aligned} \tag{7}$$

Plug (7) back to above we obtain  $\forall h \in [H]$ ,

$$\begin{aligned}
& \left| \widehat{Q}_h^{\widehat{\pi}} - Q_h^{\widehat{\pi}} \right| \leq \sqrt{\frac{2 \log(4HSA/\delta)}{N}} \sum_{t=h}^H \Gamma_{h+1:t}^{\widehat{\pi}} \left( \sqrt{\text{Var}_P(V_{t+1}^{\widehat{\pi}})} + \left\| \widehat{Q}_{t+1}^{\widehat{\pi}} - Q_{t+1}^{\widehat{\pi}} \right\|_{\infty} + \epsilon_{\text{opt}} \cdot \mathbf{1} \right) \\
& + CH^2 \sqrt{\frac{S \log(HSA/\delta)}{N}} \cdot \max_s \Delta_s \cdot \mathbf{1} + \frac{2H^2 \log(HSA/\delta)}{3N} \cdot \mathbf{1} + C \epsilon_{\text{opt}} \cdot \sqrt{\frac{H^2 S \log(SA/\delta)}{N}} \cdot \mathbf{1} \\
& \leq \sqrt{\frac{2 \log(4HSA/\delta)}{N}} \sum_{t=h}^H \Gamma_{h+1:t}^{\widehat{\pi}} \sqrt{\text{Var}_P(V_{t+1}^{\widehat{\pi}})} + \sqrt{\frac{2 \log(4HSA/\delta)}{N}} \sum_{t=h}^H \left\| \widehat{Q}_{t+1}^{\widehat{\pi}} - Q_{t+1}^{\widehat{\pi}} \right\|_{\infty} \\
& + CH^2 \sqrt{\frac{S \log(HSA/\delta)}{N}} \cdot \max_s \Delta_s \cdot \mathbf{1} + \frac{2H^2 \log(HSA/\delta)}{3N} \cdot \mathbf{1} + C_1 \epsilon_{\text{opt}} \cdot \sqrt{\frac{H^2 S \log(SA/\delta)}{N}} \cdot \mathbf{1}
\end{aligned} \tag{8}$$

Apply Lemma J.5 and the coarse uniform bound (Lemma J.10) we obtain the following lemma:

**Lemma B.8.** Given  $N > 0$  and  $\epsilon_{\text{opt}} \leq \sqrt{H/S}$ . With probability  $1 - \delta$ , for all  $h \in [H]$ ,

$$\left\| \widehat{Q}_h^{\widehat{\pi}} - Q_h^{\widehat{\pi}} \right\|_{\infty} \leq \sqrt{\frac{C_0 H^3 \log(4HSA/\delta)}{N}} + \sqrt{\frac{2 \log(4HSA/\delta)}{N}} \sum_{t=h}^H \left\| \widehat{Q}_{t+1}^{\widehat{\pi}} - Q_{t+1}^{\widehat{\pi}} \right\|_{\infty} + C' H^4 \frac{S \log(HSA/\delta)}{N}$$

*Proof.* Since

$$\begin{aligned}
\Delta_s & := \max_t |\hat{u}_t^* - u_t^*| = \max_t \left| \widehat{V}_t^*(s) - \widehat{V}_{t+1}^*(s) - (V_t^*(s) - V_{t+1}^*(s)) \right| \\
& \leq 2 \cdot \max_t \left| \widehat{V}_t^*(s) - V_t^*(s) \right| \\
& = 2 \cdot \max_t \left| \max_{\pi} \widehat{V}_t^{\pi}(s) - \max_{\pi} V_t^{\pi}(s) \right| \\
& \leq 2 \cdot \max_{\pi \in \Pi_g, t \in [H]} \left\| \widehat{V}_t^{\pi} - V_t^{\pi} \right\|_{\infty} \leq C \cdot H^2 \sqrt{\frac{S \log(HSA/\delta)}{N}}
\end{aligned} \tag{9}$$



where the last inequality uses Lemma J.10. Then apply union bound w.p.  $1 - \delta/2$ , we obtain  $\max_s \Delta_s \leq C \cdot H^2 \sqrt{\frac{S \log(HSA/\delta)}{N}}$ . Note (8) holds with probability  $1 - \delta/2$ , therefore plug above into (8) we obtain w.p.  $1 - \delta$ ,

$$\begin{aligned} \left| \widehat{Q}_h^{\widehat{\pi}} - Q_h^{\widehat{\pi}} \right| &\leq \sqrt{\frac{2 \log(4HSA/\delta)}{N}} \sum_{t=h}^H \Gamma_{h+1:t}^{\widehat{\pi}} \sqrt{\text{Var}_P(V_{t+1}^{\widehat{\pi}})} + \sqrt{\frac{2 \log(4HSA/\delta)}{N}} \sum_{t=h}^H \left\| \widehat{Q}_{t+1}^{\widehat{\pi}} - Q_{t+1}^{\widehat{\pi}} \right\|_{\infty} \\ &+ C' H^4 \frac{S \log(HSA/\delta)}{N} \cdot \mathbf{1} + C_1 \epsilon_{\text{opt}} \cdot \sqrt{\frac{H^2 S \log(SA/\delta)}{N}} \cdot \mathbf{1} \\ &\leq \left[ \sqrt{\frac{C_0 H^3 \log(4HSA/\delta)}{N}} + \sqrt{\frac{2 \log(4HSA/\delta)}{N}} \sum_{t=h}^H \left\| \widehat{Q}_{t+1}^{\widehat{\pi}} - Q_{t+1}^{\widehat{\pi}} \right\|_{\infty} + C' H^4 \frac{S \log(HSA/\delta)}{N} \right] \cdot \mathbf{1}, \end{aligned}$$

where the last inequality uses Lemma J.5 and  $\epsilon_{\text{opt}} \leq \sqrt{H/S}$  and renames  $C' = C' + C_1$ . Take  $\|\cdot\|_{\infty}$  then obtain the result.  $\blacksquare$

**Lemma B.9.** Given  $N > 0$ . Define  $C'' := 2 \cdot \max(\sqrt{C_0}, C')$  where  $C'$  is the universal constant in Lemma B.8. When  $N \geq 8H^2 \log(4HSA/\delta)$ , then with probability  $1 - \delta$ ,  $\forall h \in [H]$ ,

$$\begin{aligned} \left\| \widehat{Q}_h^{\widehat{\pi}} - Q_h^{\widehat{\pi}} \right\|_{\infty} &\leq C'' \sqrt{\frac{H^3 \log(4HSA/\delta)}{N}} + C'' \frac{H^4 S \log(HSA/\delta)}{N}. \\ \left\| \widehat{Q}_h^{\pi^*} - Q_h^{\pi^*} \right\|_{\infty} &\leq C'' \sqrt{\frac{H^3 \log(4HSA/\delta)}{N}} + C'' \frac{H^4 S \log(HSA/\delta)}{N}. \end{aligned} \tag{10}$$

*Proof.* We prove by backward induction. For  $h = H$ , by Lemma B.8

$$\begin{aligned} \left\| \widehat{Q}_H^{\widehat{\pi}} - Q_H^{\widehat{\pi}} \right\|_{\infty} &\leq \sqrt{\frac{C_0 H^3 \log(4HSA/\delta)}{N}} + \sqrt{\frac{2 \log(4HSA/\delta)}{N}} \left\| \widehat{Q}_{H+1}^{\widehat{\pi}} - Q_{H+1}^{\widehat{\pi}} \right\|_{\infty} + C' H^4 \frac{S \log(HSA/\delta)}{N} \\ &= \sqrt{\frac{C_0 H^3 \log(4HSA/\delta)}{N}} + 0 + C' H^4 \frac{S \log(HSA/\delta)}{N} \\ &\leq C'' \sqrt{\frac{H^3 \log(4HSA/\delta)}{N}} + C'' H^4 \frac{S \log(HSA/\delta)}{N}, \end{aligned}$$

for general  $h$ , by condition we have  $H \sqrt{\frac{2 \log(4HSA/\delta)}{N}} \leq 1/2$ , therefore by Lemma B.8

$$\begin{aligned} \left\| \widehat{Q}_h^{\widehat{\pi}} - Q_h^{\widehat{\pi}} \right\|_{\infty} &\leq \sqrt{\frac{C_0 H^3 \log(4HSA/\delta)}{N}} + \sqrt{\frac{2 \log(4HSA/\delta)}{N}} \sum_{t=h}^H \left\| \widehat{Q}_{t+1}^{\widehat{\pi}} - Q_{t+1}^{\widehat{\pi}} \right\|_{\infty} + C' H^4 \frac{S \log(HSA/\delta)}{N} \\ &\leq \sqrt{\frac{C_0 H^3 \log(4HSA/\delta)}{N}} + H \sqrt{\frac{2 \log(4HSA/\delta)}{N}} \max_{t+1} \left\| \widehat{Q}_{t+1}^{\widehat{\pi}} - Q_{t+1}^{\widehat{\pi}} \right\|_{\infty} + C' H^4 \frac{S \log(HSA/\delta)}{N} \\ &\leq \sqrt{\frac{C_0 H^3 \log(4HSA/\delta)}{N}} + C' H^4 \frac{S \log(HSA/\delta)}{N} \\ &+ \frac{1}{2} \left( C'' \sqrt{\frac{H^3 \log(4HSA/\delta)}{N}} + C'' \frac{H^4 S \log(HSA/\delta)}{N} \right) \\ &\leq C'' \sqrt{\frac{H^3 \log(4HSA/\delta)}{N}} + C'' \frac{H^4 S \log(HSA/\delta)}{N} \end{aligned}$$

The proof of the second claim is even easier since  $\pi^*$  is no longer a random policy and it is really just a non-uniform point-wise OPE. There are multiple ways to prove it and we leave it as an exercise to avoid redundancy: 1. Follow the same proving pipeline as  $\left\| \widehat{Q}_h^{\widehat{\pi}} - Q_h^{\widehat{\pi}} \right\|_{\infty}$  used; 2. Mimic the procedure of point-wise OPE result in Lemma 3.4. in Yin et al. [2021a].  $\blacksquare$

**Remark B.10.** Note the higher order term has dependence  $H^4 S$ , which is somewhat unsatisfactory. We use the recursion-back trick to further reduce it to  $H^{3.5} S^{0.5}$ .

**Lemma B.11.** Given  $N > 0$ . There exists universal constants  $C_1, C_2$  such that when  $N \geq C_1 H^2 \log(HSA/\delta)$ , then with probability  $1 - \delta$ ,  $\forall h \in [H]$ ,

$$\left\| \widehat{Q}_h^{\widehat{\pi}} - Q_h^{\widehat{\pi}} \right\|_{\infty} \leq C_2 \sqrt{\frac{H^3 \log(HSA/\delta)}{N}} + C_2 \frac{H^3 \sqrt{HS} \log(HSA/\delta)}{N}. \quad (11)$$

and

$$\left\| \widehat{Q}_h^{\pi^*} - Q_h^{\pi^*} \right\|_{\infty} \leq C_2 \sqrt{\frac{H^3 \log(HSA/\delta)}{N}} + C_2 \frac{H^3 \sqrt{HS} \log(HSA/\delta)}{N}.$$

*Proof.* Note

$$\begin{aligned} \widehat{V}_t^*(s) - V_t^*(s) &:= \widehat{V}_t^{\widehat{\pi}^*}(s) - V_t^{\pi^*}(s) \\ &= \widehat{V}_t^{\widehat{\pi}^*}(s) - V_t^{\widehat{\pi}^*}(s) + V_t^{\widehat{\pi}^*}(s) - V_t^{\pi^*}(s) \\ &\leq \widehat{V}_t^{\widehat{\pi}^*}(s) - V_t^{\widehat{\pi}^*}(s) \leq \left| \widehat{V}_t^{\widehat{\pi}^*}(s) - V_t^{\widehat{\pi}^*}(s) \right| \end{aligned} \quad (12)$$

and similarly  $V_t^*(s) - \widehat{V}_t^*(s) \leq \left| \widehat{V}_t^{\pi^*}(s) - V_t^{\pi^*}(s) \right|$ , therefore by Lemma B.9 (and use  $\|\widehat{V}_t^{\pi} - V_t^{\pi}\|_{\infty} \leq \|\widehat{Q}_t^{\pi} - Q_t^{\pi}\|_{\infty}$ ), with probability  $1 - \delta$ ,

$$\Delta_s \leq 2 \cdot \sup_t \left\| V_t^* - \widehat{V}_t^* \right\| \leq 2 \max_{\widehat{\pi}^*, \pi^*} \sup_t \left\| \widehat{V}_t^{\pi^*} - V_t^{\pi^*} \right\|_{\infty} \leq C_2 \sqrt{\frac{H^3 \log(HSA/\delta)}{N}} + C_2 \frac{H^4 S \log(HSA/\delta)}{N},$$

where the second inequality uses (12). This replaces the crude bound of  $O(\sqrt{H^4 S \log(HSA/\delta)/N})$  for  $\max_s \Delta_s$  (recall (9)) by  $O(\sqrt{H^3 \log(HSA/\delta)/N})$ .

Plug this back to (8) and repeat the similar analysis we end up with (11). The second result is similarly proved. ■

## B.7 Proof of Theorem 4.1

*Proof of Theorem 4.1.* Note  $n_{s,a} = \sum_{i=1}^n \sum_{t=1}^H \mathbf{1}[s_t^{(i)} = s, a_t^{(i)} = a]$ , which implies

$$\mathbb{E}[n_{s,a}] = \mathbb{E} \left[ \sum_{i=1}^n \sum_{t=1}^H \mathbf{1}[s_t^{(i)} = s, a_t^{(i)} = a] \right] = n \cdot \sum_{t=1}^H d_t^{\mu}(s, a).$$

Or equivalently,  $n_{s,a}$  follows  $\text{Binomial}(n, \sum_{t=1}^H d_t^{\mu}(s, a))$ . Then apply the first result of Lemma J.1 by taking  $\theta = 1/2$ , we have when  $n > 1/d_m \cdot \log(HSA/\delta)^{12}$ , then with probability  $1 - \delta$ ,

$$n_{s,a} \geq \frac{1}{2} n \cdot \sum_{t=1}^H d_t^{\mu}(s, a), \quad \forall s \in \mathcal{S}, a \in \mathcal{A}.$$

This further implies w.p.  $1 - \delta$ ,  $n_{s,a} \geq \frac{1}{2} n \cdot \sum_{t=1}^H d_t^{\mu}(s, a) = \frac{1}{2} n \cdot H \cdot d^{\mu}(s, a) \geq \frac{1}{2} n H \cdot d_m$  and further ensures

$$N := \min_{s,a} n_{s,a} \geq \frac{1}{2} n H \cdot d_m.$$

Finally, apply above to Lemma B.11, we can get over with the condition on  $N$  and obtain the stated result. ■

<sup>12</sup>The exact sufficient condition for applying Lemma J.1 is  $n > 1/\sum_{t=1}^H d_t(s, a) \cdot \log(HSA/\delta)$  for all  $s, a$ . However, since  $\sum_{t=1}^H d_t(s, a) \geq H d_m \geq d_m$ , our condition  $n > 1/d_m \cdot \log(HSA/\delta)$  used here is a much stronger version thus Lemma J.1 apply.

## C Proof of minimax lower bound for model-based global uniform OPE

*Proof of Theorem 3.1.* In particular, we first focus on the case where  $H = 2$  and extend the result of  $H = 2$  to the general  $H \geq 3$  at the end.

First of all, by Definition 2.1 let  $\widehat{P}$  be the learned transition by certain model-based method. Since we assume  $r_h$  is known and by convention  $Q_{H+1}^\pi = 0$  for any  $\pi$ , then by Bellman equation

$$\widehat{Q}_h^\pi = r_h + \widehat{P}^{\pi_{h+1}} \widehat{Q}_{h+1}^\pi, \forall h \in [H].$$

In particular,  $\widehat{Q}_{H+1}^\pi = Q_{H+1}^\pi = 0$ , and this implies

$$\widehat{Q}_H^\pi = r_H + \widehat{P}^{\pi_{H+1}} \widehat{Q}_{H+1}^\pi = r_H; \quad Q_H^\pi = r_H + P^{\pi_{H+1}} Q_{H+1}^\pi = r_H + 0 = r_H$$

Now, again by definition of Bellman equation

$$\begin{aligned} \widehat{Q}_{H-1}^\pi &= r_{H-1} + \widehat{P}^{\pi_H} \widehat{Q}_H^\pi = r_{H-1} + \widehat{P}^{\pi_H} r_H \\ Q_{H-1}^\pi &= r_{H-1} + P^{\pi_H} Q_H^\pi = r_{H-1} + P^{\pi_H} r_H \end{aligned}$$

Therefore

$$\begin{aligned} & \sup_{\pi \in \Pi_g} \left\| \widehat{Q}_{H-1}^\pi - Q_{H-1}^\pi \right\|_\infty = \sup_{\pi \in \Pi_g} \left\| \left( \widehat{P}^{\pi_H} - P^{\pi_H} \right) r_H \right\|_\infty \\ &= \sup_{\pi \in \Pi_g} \left\| \left( \widehat{P} - P \right) r_H^{\pi_H} \right\|_\infty = \sup_{\pi \in \Pi_g} \sup_{s,a} \left| \left( \widehat{P}(\cdot|s,a) - P(\cdot|s,a) \right) r_H^{\pi_H} \right| \\ &= \sup_{s,a} \sup_{\pi \in \Pi_g} \left| \left( \widehat{P}(\cdot|s,a) - P(\cdot|s,a) \right) r_H^{\pi_H} \right|, \end{aligned}$$

where  $P^{\pi_H} \in \mathbb{R}^{S \cdot A \times S \cdot A}$ ,  $r_H \in \mathbb{R}^{S \cdot A}$ ,  $P \in \mathbb{R}^{S \cdot A \times S}$  and  $r_H^{\pi_H} \in \mathbb{R}^S$ . Note  $A \geq 2$ , so we can choose an instance of  $r_H$  as (there are at least two actions since  $A \geq 2$ )

$$(r_H(s, a_1), r_H(s, a_2), \dots) := (1, 0, \dots) \quad \forall s \in \mathcal{S}.$$

Above implies: if  $\pi_H(s) = a_1$ , then  $r_H^{\pi_H}(s) = 1$ ; if  $\pi_H(s) = a_2$ , then  $r_H^{\pi_H}(s) = 0$ ; ...

Hence, if  $\Pi_g$  is the global deterministic policy class, then  $r_H^{\pi_H}$  can traverse all the  $S$ -dimensional vectors with either 0 or 1 in each coordinate, which is exactly

$$\{r_H^{\pi_H} \in \mathbb{R}^S : \pi_H \in \Pi_g\} \supset \{0, 1\}^S.$$

Now let us first consider fixed  $s, a$ . Then with this choice of  $r$ , above implies

$$\begin{aligned} & \sup_{\pi \in \Pi_g} \left| \left( \widehat{P}(\cdot|s,a) - P(\cdot|s,a) \right) r_H^{\pi_H} \right| \geq \sup_{r \in \{0,1\}^S} \left| \left( \widehat{P}(\cdot|s,a) - P(\cdot|s,a) \right) \cdot r \right| \\ &= \sup_{r \in \{0,1\}^S} \left| \sum_{i:r_i=1} \left( \widehat{P}(s_i|s,a) - P(s_i|s,a) \right) \right| \end{aligned}$$

Let  $I_+ := \{i \in [S] : s.t. \widehat{P}(s_i|s,a) - P(s_i|s,a) > 0\}$  be the set of indices where  $\widehat{P}(s_i|s,a) - P(s_i|s,a)$  are positive and  $I_- := \{i \in [S] : s.t. \widehat{P}(s_i|s,a) - P(s_i|s,a) < 0\}$  be the set of indices where  $\widehat{P}(s_i|s,a) - P(s_i|s,a)$  are negative, then we further have

$$\begin{aligned} & \sup_{r \in \{0,1\}^S} \left| \sum_{i:r_i=1} \left( \widehat{P}(s_i|s,a) - P(s_i|s,a) \right) \right| \\ & \geq \max \left\{ \left| \sum_{i \in I_+} [\widehat{P}(s_i|s,a) - P(s_i|s,a)] \right|, \left| \sum_{i \in I_-} [\widehat{P}(s_i|s,a) - P(s_i|s,a)] \right| \right\} \\ &= \max \left\{ \sum_{i \in I_+} \left| \widehat{P}(s_i|s,a) - P(s_i|s,a) \right|, \sum_{i \in I_-} \left| \widehat{P}(s_i|s,a) - P(s_i|s,a) \right| \right\} \end{aligned}$$

On the other hand, we have

$$\sum_{i \in I^+} \left| \widehat{P}(s_i | s, a) - P(s_i | s, a) \right| + \sum_{i \in I^-} \left| \widehat{P}(s_i | s, a) - P(s_i | s, a) \right| = \left\| \widehat{P}(\cdot | s, a) - P(\cdot | s, a) \right\|_1$$

since  $\widehat{P}(s_i | s, a) - P(s_i | s, a) = 0$  contributes nothing to the  $l_1$  norm. Combine all the steps together, we obtain

$$\sup_{\pi \in \Pi_g} \left\| \widehat{Q}_{H-1}^\pi - Q_{H-1}^\pi \right\|_\infty \geq \sup_{s,a} \frac{1}{2} \left\| \widehat{P}(\cdot | s, a) - P(\cdot | s, a) \right\|_1 \underset{\textcircled{1}}{\geq} c \cdot \sup_{s,a} \sqrt{\frac{S}{n_{s,a}}} \underset{\textcircled{2}}{\geq} c' \sqrt{\frac{S}{nd_m}} \quad (13)$$

holds with constant probability  $p$ . Here  $n_{s,a} = \sum_{h=1}^H \sum_{i=1}^n \mathbf{1}[s_h^{(i)} = s, a_h^{(i)} = a]$  is the number of data pieces visited  $(s, a)$  in  $n$  episodes. Now we explain how to obtain  $\textcircled{1}$  and  $\textcircled{2}$ . In particular, we first explain  $\textcircled{2}$ .

**Explain  $\textcircled{2}$ .** Recall we consider the case  $H = 2$ . Then

$$\mathbb{E}[n_{s,a}] = \mathbb{E} \left[ \sum_{h=1}^H \sum_{i=1}^n \mathbf{1}[s_h^{(i)} = s, a_h^{(i)} = a] \right] = n \sum_{i=1}^2 \mathbb{E} \left[ \mathbf{1}[s_h^{(1)} = s, a_h^{(1)} = a] \right] = n \sum_{h=1}^2 d_h^\mu(s, a)$$

i.e.  $n_{s,a}$  is a Binomial random variable with parameter  $n$  and  $\sum_{h=1}^2 d_h^\mu(s, a)$ . Then by Lemma J.1, choose  $\theta = \frac{1}{2}$ , apply the second result, we obtain when  $n > (1/2d_m) \cdot \log(SA/\delta)^{13}$ , with probability  $1 - \delta$

$$n_{s,a} \leq \frac{3}{2} n \cdot \sum_{h=1}^2 d_h^\mu(s, a), \quad \forall s, a$$

Next, similar to the lower bound proof (Theorem G.2.) of Yin et al. [2021a], we can choose  $\mu$  and  $M$  (**near uniform** but not exact uniform) such that  $d_h^\mu(s, a) \leq C \cdot d_m$ , which further implies  $n_{s,a} \leq C \cdot n \cdot d_m, \forall s, a$ . Summarize above we end up with the following Lemma:

**Lemma C.1.** *Suppose  $n \geq (1/2d_m) \cdot \log(SA/\delta)$ , then*

$$\sup_{\mu, M} \mathbb{P} \left[ \sqrt{\frac{1}{n_{s,a}}} \geq C \cdot \sqrt{\frac{1}{n \cdot d_m}}, \forall s, a \right] \geq 1 - \delta$$

**Explain  $\textcircled{1}$ .** To make the explanation rigorous, we first fix a pair  $(s, a)$  and conditional on  $n_{s,a}$ . Then by a direct translation of Lemma J.7, we have

$$\inf_{\widehat{P}} \sup_{P(\cdot | s, a) \in \mathcal{M}_S} \mathbb{P} \left[ \left\| \widehat{P}(\cdot | s, a) - P(\cdot | s, a) \right\|_1 \geq \frac{1}{8} \sqrt{\frac{eS}{2n_{s,a}}} - o(\cdot) \mid n_{s,a} \geq \frac{e}{32} S \right] \geq p,$$

where  $o(\cdot)$  is some exponentially small term in  $S, n$ . Now we consider everything under the condition  $n \geq \frac{e}{32} \cdot S/d_m \log(SA/\delta)$ . Next again take  $\theta = 1/2$ , then by the first result of Lemma J.1, with probability  $1 - \delta$ ,

$$n_{s,a} \geq \frac{1}{2} n \cdot \sum_{h=1}^2 d_h^\mu(s, a) \geq n \cdot d_m \geq \frac{e}{32} S \log(SA/\delta).$$

<sup>13</sup>By Lemma J.1, the inequality holds as long as  $n \geq 1/\sum_{h=1}^2 d_h^\mu(s, a) \log(SA/\delta)$ , here  $n > (1/2d_m) \cdot \log(SA/\delta)$  is a stronger sufficient condition.

where the last inequality uses the condition  $n \geq \frac{e}{32} \cdot S/d_m \log(SA/\delta)$ . Therefore this implies

$$\begin{aligned}
& \inf_{\hat{P}} \sup_{P(\cdot|s,a) \in \mathcal{M}_S} \mathbb{P} \left[ \|\hat{P}(\cdot|s,a) - P(\cdot|s,a)\|_1 \geq \frac{1}{8} \sqrt{\frac{eS}{2n_{s,a}}} - o(\cdot) \right] \\
&= \inf_{\hat{P}} \sup_{P(\cdot|s,a) \in \mathcal{M}_S} \left( \mathbb{P} \left[ \|\hat{P}(\cdot|s,a) - P(\cdot|s,a)\|_1 \geq \frac{1}{8} \sqrt{\frac{eS}{2n_{s,a}}} - o(\cdot) \mid n_{s,a} \geq \frac{e}{32}S \right] \cdot \mathbb{P} \left[ n_{s,a} \geq \frac{e}{32}S \right] \right. \\
&+ \mathbb{P} \left[ \|\hat{P}(\cdot|s,a) - P(\cdot|s,a)\|_1 \geq \frac{1}{8} \sqrt{\frac{eS}{2n_{s,a}}} - o(\cdot) \mid n_{s,a} \leq \frac{e}{32}S \right] \cdot \mathbb{P} \left[ n_{s,a} \leq \frac{e}{32}S \right] \Big) \\
&\geq \inf_{\hat{P}} \sup_{P(\cdot|s,a) \in \mathcal{M}_S} \mathbb{P} \left[ \|\hat{P}(\cdot|s,a) - P(\cdot|s,a)\|_1 \geq \frac{1}{8} \sqrt{\frac{eS}{2n_{s,a}}} - o(\cdot) \mid n_{s,a} \geq \frac{e}{32}S \right] \cdot \mathbb{P} \left[ n_{s,a} \geq \frac{e}{32}S \right] \\
&\geq p \cdot (1 - \delta),
\end{aligned}$$

To sum up, we have the following lemma:

**Lemma C.2.** *Let  $n \geq \frac{e}{32}S/d_m \cdot \log(SA/\delta)$ , then there exists a  $0 < p < 1$ ,*

$$\inf_{\hat{P}} \sup_{P(\cdot|s,a) \in \mathcal{M}_S} \mathbb{P} \left[ \|\hat{P}(\cdot|s,a) - P(\cdot|s,a)\|_1 \geq \frac{1}{8} \sqrt{\frac{eS}{2n_{s,a}}} - o(\cdot) \right] \geq p \cdot (1 - \delta).$$

Now we finish the proof for the case where  $H = 2$ . First note by (13),

$$\sup_{\pi \in \Pi_g} \left\| \hat{Q}_{H-1}^\pi - Q_{H-1}^\pi \right\|_\infty \geq \sup_{s,a} \frac{1}{2} \left\| \hat{P}(\cdot|s,a) - P(\cdot|s,a) \right\|_1$$

with probability 1, therefore by (13), Lemma C.1, Lemma C.2 we have

$$\inf_{\hat{P}} \sup_{P \in \mathcal{M}_S} \mathbb{P} \left[ \sup_{\pi \in \Pi_g} \left\| \hat{Q}_{H-1}^\pi - Q_{H-1}^\pi \right\|_\infty \geq C \cdot \sqrt{\frac{S}{nd_m}} \right] \geq p(1 - \delta) - \delta$$

when  $n \geq c \cdot S/d_m \log(SA/\delta)$  for some  $c \geq \frac{e}{32}$ . Above holds for any  $\delta$ .

It is easy to check  $\frac{3}{2} \frac{p}{1+p} \leq 1$ , therefore, in particular we set  $\delta = \frac{3}{2} \frac{p}{1+p}$ , direct calculation shows

$$p(1 - \delta) - \delta = \frac{p}{2},$$

which completes the proof for  $H = 2$ .

**Extend to the general  $H \geq 3$ .**

**Step 1.** Similar to the decomposition in section B.4, we also have:

$$\hat{Q}_t^\pi - Q_t^\pi = \sum_{h=t}^H \hat{\Gamma}_{t+1:h}^\pi (\hat{P} - P) V_{h+1}^\pi$$

**Step 2.** Now choosing rewards recursively from back (with  $\|r_H\|_\infty = c$  sufficiently small) such that  $1 \geq r_h \geq (\|r_{h+1}\|_\infty + \dots + \|r_H\|_\infty)$  element-wisely  $\forall h$ , and  $\max_{s,a} r_h(s,a) = 3 \min_{s,a} r_h(s,a)$ . We denote  $r_{h,max} := \max_{s,a} r_h(s,a)$  and  $r_{h,min} := \min_{s,a} r_h(s,a)$ . This choice guarantees:

$$r_{h,min} := \min_{s,a} r_h(s,a) > \|P^{\pi_{h+1}} r_{h+1} + \dots + P^{\pi_{h+1:H}} r_H\|_\infty$$

since  $P^{\pi_h}$  is row-stochastic.

**Step 3.** Next note  $V_h^\pi = r_h + P^{\pi_{h+1}} r_{h+1} + \dots + P^{\pi_{h+1:H}} r_H$ , so set  $(r_h(s, a_1), r_h(s, a_2), \dots) := (\max_{s,a} r_h(s,a), \min_{s,a} r_h(s,a), \dots)$ , then choose  $\pi_h$  similar to the  $H = 2$  case and use **Step 1** and **Step 2** we have

$$\begin{aligned}
|(\hat{P}_{s,a} - P_{s,a}) V_h^\pi| &\geq \frac{1}{2} \|\hat{P}_{s,a} - P_{s,a}\|_1 \cdot (r_{h,max} - r_{h,min} - (P^{\pi_{h+1}} r_{h+1} + \dots + P^{\pi_{h+1:H}} r_H)) \\
&\geq \frac{1}{2} \|\hat{P}_{s,a} - P_{s,a}\|_1 \cdot r_{h,min} \geq \frac{1}{2} \|\hat{P}_{s,a} - P_{s,a}\|_1 \cdot c
\end{aligned}$$

where the reasoning of the first inequality is similar to the case of  $H = 2$ . Next use  $\hat{\Gamma}_{t+1:h}^\pi$  is row-stochastic then from **Step 1** and take the sum we have

$$\|\hat{Q}_1^\pi - Q_1^\pi\|_\infty \geq \frac{1}{2}c \cdot H \min_{s,a} \|\hat{P}_{s,a} - P_{s,a}\|_1.$$

for such choice of rewards and  $\pi$ .

**Step 4.** However, in the above construction  $c$  actually depends on  $H$  due to the design  $1 \geq r_h \geq (\|r_{h+1}\|_\infty + \dots + \|r_H\|_\infty)$ . To get a universal constant  $c$  we could use the bound  $\|\hat{Q}_1^\pi - Q_1^\pi\|_\infty \gtrsim r_{\frac{H}{2}, \min} \cdot \frac{H}{2} \min_{s,a} \|\hat{P}_{s,a} - P_{s,a}\|_1$  instead, where  $r_{\frac{H}{2}, \min}$  in Step 2 is universally lower bounded. Then we apply  $\|\hat{P}_{s,a} - P_{s,a}\|_1 \gtrsim \Omega(\sqrt{S/nd_m})$  to obtain the lower bound  $\Omega(\sqrt{H^2 S/nd_m})$ . ■

**Remark C.3.** We point out while our lower bound of  $\Omega(H^2 S/d_m \epsilon^2)$  for uniform OPE appears to be qualitatively similar to the lower bound of  $\Omega(H^2 S^2 A/\epsilon^2)$  derived for the online reward-free RL setting [Jin et al., 2020a], our result is not implied by theirs and cannot be proven by directly adapting their construction. Those two results are in principle different since: the result in [Jin et al., 2020a] is learning-oriented where they define the problem class on  $O(S)$  states and forcing  $\Omega(SA/\epsilon^2)$  episodes in each state and end up with  $O(S^2 A/\epsilon^2)$  complexity; our result is evaluation-oriented where we need reduce the uniform evaluation problem to estimating probability distribution in  $\ell_1$ -error. The global uniform OPE and the reward-free setting are also different tasks (one cannot imply the other): the former deals with uniform convergence over all policies but with a fixed reward while the latter aims at learning simultaneously over all rewards.

## D Proof for optimal offline learning (Corollary 4.2)

*Proof.* This is a corollary of Theorem 4.1. Indeed, by taking  $\hat{\pi} = \hat{\pi}^*$ , we first have

$$\|\hat{V}_1^{\hat{\pi}^*} - V_1^{\hat{\pi}^*}\|_\infty \leq \|\hat{Q}_1^{\hat{\pi}^*} - Q_1^{\hat{\pi}^*}\|_\infty \leq C \left[ \sqrt{\frac{H^2 \iota}{nd_m}} + \frac{H^{2.5} S^{0.5} \iota}{nd_m} \right].$$

Similar to the second result in Lemma B.11, we also have

$$\|\hat{V}_1^{\hat{\pi}^*} - V_1^{\hat{\pi}^*}\|_\infty \leq \|\hat{Q}_1^{\hat{\pi}^*} - Q_1^{\hat{\pi}^*}\|_\infty \leq C \left[ \sqrt{\frac{H^2 \iota}{nd_m}} + \frac{H^{2.5} S^{0.5} \iota}{nd_m} \right].$$

Next, recall the definition of  $\hat{\pi} \in \Pi_l$  that

$$\|\hat{V}_1^{\hat{\pi}^*} - \hat{V}_1^{\hat{\pi}}\|_\infty \leq \epsilon_{\text{opt}},$$

and Theorem 4.1 again that

$$\|\hat{V}_1^{\hat{\pi}} - V_1^{\hat{\pi}}\|_\infty \leq \|\hat{Q}_1^{\hat{\pi}} - Q_1^{\hat{\pi}}\|_\infty \leq C \left[ \sqrt{\frac{H^2 \iota}{nd_m}} + \frac{H^{2.5} S^{0.5} \iota}{nd_m} \right].$$

Therefore

$$\begin{aligned}
V_1^{\pi^*} - V_1^{\hat{\pi}} &= V_1^{\pi^*} - V_1^{\hat{\pi}^*} + V_1^{\hat{\pi}^*} - V_1^{\hat{\pi}} \\
&\leq \max_{\hat{\pi}^*, \pi^*} \left\| \widehat{V}_1^{\pi^*} - V_1^{\pi^*} \right\|_{\infty} + V_1^{\hat{\pi}^*} - V_1^{\hat{\pi}} \\
&= \max_{\hat{\pi}^*, \pi^*} \left\| \widehat{V}_1^{\pi^*} - V_1^{\pi^*} \right\|_{\infty} + \left( V_1^{\hat{\pi}^*} - \widehat{V}_1^{\hat{\pi}^*} \right) + \left( \widehat{V}_1^{\hat{\pi}^*} - \widehat{V}_1^{\hat{\pi}} \right) + \left( \widehat{V}_1^{\hat{\pi}} - V_1^{\hat{\pi}} \right) \\
&\leq 3C \left[ \sqrt{\frac{H^2 \iota}{nd_m}} + \frac{H^{2.5} S^{0.5} \iota}{nd_m} \right] + \left\| \widehat{V}_1^{\hat{\pi}^*} - \widehat{V}_1^{\hat{\pi}} \right\|_{\infty} \cdot \mathbf{1} \\
&\leq 3C \left[ \sqrt{\frac{H^2 \iota}{nd_m}} + \frac{H^{2.5} S^{0.5} \iota}{nd_m} \right] + \epsilon_{\text{opt}} \cdot \mathbf{1}.
\end{aligned}$$

This completes the proof. ■

## E Proof for optimal offline Task-agnostic learning (Theorem 5.3)

*Proof.* Recall the definition of offline task-agnostic setting, where  $K$  tasks corresponds to  $K$  MDPs  $M_k = (\mathcal{S}, \mathcal{A}, P, r_k, H, d_1)$  with different mean reward functions  $r_k$ 's. Since the incremental number of rewards do not incur randomness, therefore by Corollary 4.2, choose  $\hat{\pi}_k = \hat{\pi}_k^*$  and apply a union bound we obtain with probability  $1 - \delta$ ,

$$\begin{aligned}
\sup_{k \in [K]} \|V_{1, M_k}^* - V_{1, M_k}^{\hat{\pi}_k^*}\|_{\infty} &\leq O \left[ \sqrt{\frac{H^2 \log(HSAK/\delta)}{nd_m}} + \frac{H^{2.5} S^{0.5} \log(HSAK/\delta)}{nd_m} \right] \\
&= O \left[ \sqrt{\frac{H^2 (\iota + \log(K))}{nd_m}} + \frac{H^{2.5} S^{0.5} (\iota + \log(K))}{nd_m} \right],
\end{aligned}$$

which completes the proof. ■

**Remark E.1.** We stress that Section 3 of Zhang et al. [2020b] claims the definition of task-agnostic RL setting embraces one challenge that  $r_k^{(i)}$ 's are the observed random realizations and the need to accurately estimate mean rewards  $r_k$ 's causes the additional  $\log(K)$  dependence. However, for offline case, this is not essential since, by straightforward calculation, estimating  $r_k^{(i)}$ 's accurately only requires  $\tilde{O}(\log(K)/d_m \epsilon^2)$  samples, which is of lower order comparing to  $\tilde{O}(H^2 \log(K)/d_m \epsilon^2)$  learning bound. Therefore, in Definition 5.1 we do not incorporate the random version statement for reward  $r_k$ .

### E.1 Offline Learning in the Constrained MDPs (CMDP)

Recently, there is a line of studies in the Constrained Markov Decision Processes (CMDP) (e.g. ?), where the MDP  $M = (\mathcal{S}, \mathcal{A}, P, H, d_1)$ . When the reward is set to be  $r$ , it defines the objective function  $V_r^{\pi}$  and there is another utility function  $g$  that defines the constraint. To be concrete, the objective formulated as:

$$\underset{\pi \in \Delta(\mathcal{A}|\mathcal{S}, H)}{\text{maximize}} V_{r,1}^{\pi}(x_1) \quad \text{subject to} \quad V_{g,1}^{\pi}(x_1) \geq b \quad (14)$$

where  $b \in (0, H]$  is some constraint threshold. In addition, the formulation needs a Slater condition that: there exists  $\gamma > 0$  and  $\bar{\pi} \in \Delta(\mathcal{A}|\mathcal{S}, H)$  such that  $V_{g,1}^{\bar{\pi}}(x_1) \geq b + \gamma$ .

Let  $\pi^*$  be the optimal solution that is compatible with the programming (14) (note this is **different** from the optimal policy that maximizes  $V_{r,1}^\pi$  only), then by feasibility it satisfies  $V_{g,1}^{\pi^*} \geq b$ .

Now let  $\hat{\pi}^*$  be the solution of the empirical program:

$$\underset{\pi \in \Delta(\mathcal{A}|\mathcal{S},H)}{\text{maximize}} \widehat{V}_{r,1}^\pi(x_1) \quad \text{subject to} \quad \widehat{V}_{g,1}^\pi(x_1) \geq b \quad (15)$$

then we can show  $\hat{\pi}^*$  is a near-optimal solution for (14) via the local uniform convergence guarantee (Theorem 4.1).

Indeed, define a surrogate program:

$$\underset{\pi \in \Delta(\mathcal{A}|\mathcal{S},H)}{\text{maximize}} \widehat{V}_{r,1}^\pi(x_1) \quad \text{subject to} \quad V_{g,1}^\pi(x_1) \geq b \quad (16)$$

and let  $\bar{\pi}^*$  be the solution for (16). Then apparently  $\bar{\pi}^*$  satisfies  $V_{g,1}^{\bar{\pi}^*}(x_1) \geq b$ . Moreover, we have

$$\begin{aligned} V_{r,1}^{\bar{\pi}^*} - V_{r,1}^{\pi^*} &= V_{r,1}^{\bar{\pi}^*} - \widehat{V}_{r,1}^{\bar{\pi}^*} + \widehat{V}_{r,1}^{\bar{\pi}^*} - \widehat{V}_{r,1}^{\pi^*} + \widehat{V}_{r,1}^{\pi^*} - V_{r,1}^{\pi^*} \\ &\leq V_{r,1}^{\bar{\pi}^*} - \widehat{V}_{r,1}^{\bar{\pi}^*} + 0 + \widehat{V}_{r,1}^{\pi^*} - V_{r,1}^{\pi^*} \\ &\leq 2 \sup_{\pi} |V_{r,1}^\pi - \widehat{V}_{r,1}^\pi| \end{aligned}$$

On the other hand, by local uniform convergence guarantee,  $|V_{g,1}^\pi - \widehat{V}_{g,1}^\pi| \leq \tilde{O}(\sqrt{H^2/nd_m})$  for all  $\pi$  in the  $\sqrt{H/S}$ -neighborhood of  $\hat{\pi}^*$  (w.r.t  $g$ ). This implies

$$V_{r,1}^{\bar{\pi}^*} - V_{r,1}^{\pi^*} \leq 2 \sup_{\pi} |V_{r,1}^\pi - \widehat{V}_{r,1}^\pi| + \tilde{O}(\sqrt{H^2/nd_m})$$

and the violation of the constraint is bounded by  $\tilde{O}(\sqrt{H^2/nd_m})$ . This means any approach that solves (15) is near-optimal for the original constrained MDP task given the uniform convergence guarantee.

## F Proof for optimal offline Reward-free learning (Theorem 5.4)

Similar to before, recall  $n_{s,a} = \sum_{h=1}^H \sum_{i=1}^n \mathbf{1}[s_h^{(i)} = s, a_h^{(i)} = a]$ . We first prove two lemmas which essentially provide a version of “*Maximal Bernstein inequality*”. We first fix a pair  $(s, a)$  and then conditional on  $n_{s,a}$ .

**Lemma F.1.** We define  $\epsilon_1 = \sqrt{\frac{1}{HS^2}}$ . Let  $\mathcal{G} = \{[i_1\epsilon_1, i_2\epsilon_1, \dots, i_S\epsilon_1]^\top | i_1, i_2, \dots, i_S \in \mathbb{Z}\} \cap [0, H]^S$  be the  $S$ -dimensional grid. Next define  $\iota_1 = \log[(\sqrt{H^3S^2})^S/\delta]$ . Then with probability  $1 - \delta$ ,

$$\left| (P_{s,a} - \widehat{P}_{s,a})w \right| \leq \sqrt{\frac{2\text{Var}_{s,a}(w)\iota_1}{n_{s,a}}} + \frac{2H\iota_1}{3n_{s,a}}, \quad \forall w \in \mathcal{G}.$$

This is by the direct application of Bernstein inequality with a union bound, where the cardinality of  $\mathcal{G}$  is

$$\left(\frac{H}{\epsilon_1}\right)^S = \left(\sqrt{H^3S^2}\right)^S.$$

**Lemma F.2.** Let the  $S$ -dimensional grid be  $\mathcal{G} = \{[i_1\epsilon_1, i_2\epsilon_1, \dots, i_S\epsilon_1]^\top | i_1, i_2, \dots, i_S \in \mathbb{Z}\} \cap [0, H]^S$  and define  $\iota_1 = \log[(\sqrt{H^3S^2})^S/\delta]$ . It holds with probability  $1 - \delta$ ,

$$\left| (P_{s,a} - \widehat{P}_{s,a})v \right| \leq \sqrt{\frac{2\text{Var}_{s,a}(v)\iota_1}{n_{s,a}}} + C\sqrt{\frac{\iota_1}{n_{s,a}HS}} + \frac{2H\iota_1}{3n_{s,a}}, \quad \forall v \in [0, H]^S.$$

*Proof.* Let  $z := \text{Proj}_{\mathcal{G}}(v)$ . Then by design of  $\mathcal{G}$  we have

$$\|z - v\|_\infty \leq \epsilon_1 = \sqrt{\frac{1}{HS^2}}.$$



Therefore we obtain  $\forall v \in [0, H]^S$ ,

$$\begin{aligned}
\left| (P_{s,a} - \widehat{P}_{s,a})v \right| &\leq \left| (P_{s,a} - \widehat{P}_{s,a})(v - z) \right| + \left| (P_{s,a} - \widehat{P}_{s,a})z \right| \\
&\leq \left\| P_{s,a} - \widehat{P}_{s,a} \right\|_1 \|z - v\|_\infty + \left| (P_{s,a} - \widehat{P}_{s,a})z \right| \\
&\leq c \sqrt{\frac{S}{n_{s,a}}} \|z - v\|_\infty + \sqrt{\frac{2\text{Var}_{s,a}(z)\iota_1}{n_{s,a}}} + \frac{2H\iota_1}{3n_{s,a}} \\
&\leq c \sqrt{\frac{S}{n_{s,a}}} \|z - v\|_\infty + \sqrt{\frac{2\|z - v\|_\infty^2 \iota_1}{n_{s,a}}} + \sqrt{\frac{2\text{Var}_{s,a}(v)\iota_1}{n_{s,a}}} + \frac{2H\iota_1}{3n_{s,a}} \\
&\leq C \sqrt{\frac{S\iota_1}{n_{s,a}}} \|z - v\|_\infty + \sqrt{\frac{2\text{Var}_{s,a}(v)\iota_1}{n_{s,a}}} + \frac{2H\iota_1}{3n_{s,a}} \\
&\leq C \sqrt{\frac{\iota_1}{n_{s,a}HS}} + \sqrt{\frac{2\text{Var}_{s,a}(v)\iota_1}{n_{s,a}}} + \frac{2H\iota_1}{3n_{s,a}}.
\end{aligned}$$

where the third inequality uses Lemma F.1 and Lemma J.9. ■

Then recall  $N := \min_{s,a} n_{s,a}$ , by Lemma F.2 and a union bound we obtain with probability  $1 - \delta$ , element-wisely,

$$\left| (P - \widehat{P})v \right| \leq C \cdot \left( \sqrt{\frac{2\text{Var}_{s,a}(v)\iota_2}{N}} + 2\sqrt{\frac{\iota_2}{N \cdot HS}} + \frac{2H\iota_2}{3N} \right) \cdot \mathbf{1}, \quad \forall v \in [0, H]^S, \quad (17)$$

where  $\iota_2 = S \log(HSA/\delta)$ .

**Remark F.3.** Equation 17 is a form of maximal Bernstein inequality as it keeps validity for all  $v \in [0, H]^S$ . The price for this stronger result is the extra  $S$  factor (coming from  $\iota_2$ ) in the dominate term.

Now, for any reward  $r$ , by (empirical) Bellman equation we have element-wisely:

$$\begin{aligned}
\widehat{Q}_h^{\widehat{\pi}^*} - Q_h^{\widehat{\pi}^*} &= r_h + \widehat{P}^{\widehat{\pi}^*_{h+1}} \widehat{Q}_{h+1}^{\widehat{\pi}^*} - r_h - P^{\widehat{\pi}^*_{h+1}} Q_{h+1}^{\widehat{\pi}^*} \\
&= \left( \widehat{P}^{\widehat{\pi}^*_{h+1}} - P^{\widehat{\pi}^*_{h+1}} \right) \widehat{Q}_{h+1}^{\widehat{\pi}^*} + P^{\widehat{\pi}^*_{h+1}} \left( \widehat{Q}_{h+1}^{\widehat{\pi}^*} - Q_{h+1}^{\widehat{\pi}^*} \right) \\
&= \left( \widehat{P} - P \right) \widehat{V}_{h+1}^{\widehat{\pi}^*} + P^{\widehat{\pi}^*_{h+1}} \left( \widehat{Q}_{h+1}^{\widehat{\pi}^*} - Q_{h+1}^{\widehat{\pi}^*} \right) \\
&= \dots = \sum_{t=h}^H \Gamma_{h+1:t}^{\widehat{\pi}^*} \left( \widehat{P} - P \right) \widehat{V}_{t+1}^{\widehat{\pi}^*}
\end{aligned}$$

where  $\Gamma_{h+1:t}^{\pi} = \prod_{i=h+1}^t P^{\pi_i}$  is multi-step state-action transition and  $\Gamma_{h+1:h} := I$ .

**Concentration on  $(\hat{P} - P) \hat{V}_h^*$ .** Now by (17), we have the following:

$$\begin{aligned}
& (\hat{P}_{s,a} - P_{s,a}) \hat{V}_h^* \\
& \leq C \cdot \left( \sqrt{\frac{2\text{Var}_{s,a}(\hat{V}_h^*)\iota_2}{N}} + 2\sqrt{\frac{\iota_2}{N \cdot HS}} + \frac{2H\iota_2}{3N} \right) \\
& \leq C \cdot \left( \sqrt{\frac{2\text{Var}_{s,a}(V_h^{\hat{\pi}^*})\iota_2}{N}} + 2\sqrt{\frac{\iota_2}{N \cdot HS}} + \sqrt{\frac{2\iota_2}{N}} \cdot \|\hat{V}_h^{\hat{\pi}^*} - V_h^{\hat{\pi}^*}\|_\infty + \frac{2H\iota_2}{3N} \right) \quad (18) \\
& \leq C \cdot \left( \sqrt{\frac{2\text{Var}_{s,a}(V_h^{\hat{\pi}^*})\iota_2}{N}} + 2\sqrt{\frac{\iota_2}{N \cdot HS}} + \sqrt{\frac{2\iota_2}{N}} \cdot H^2 \sqrt{\frac{S}{N}} + \frac{2H\iota_2}{3N} \right) \\
& \leq C' \cdot \left( \sqrt{\frac{2\text{Var}_{s,a}(V_h^{\hat{\pi}^*})\iota_2}{N}} + 2\sqrt{\frac{\iota_2}{N \cdot HS}} + \frac{2H^2 S \log(HSA/\delta)}{N} \right),
\end{aligned}$$

where the third inequality uses Lemma J.10<sup>14</sup>. Then above implies

$$\begin{aligned}
& \hat{Q}_h^{\hat{\pi}^*} - Q_h^{\hat{\pi}^*} \\
& \leq C' \sum_{t=h}^H \Gamma_{h+1:t}^{\hat{\pi}^*} \cdot \left( \sqrt{\frac{2\text{Var}_{s,a}(V_h^{\hat{\pi}^*})\iota_2}{N}} + 2\sqrt{\frac{\iota_2}{N \cdot HS}} + \frac{2H^2 S \log(HSA/\delta)}{N} \right) \\
& \leq C' \left[ \sum_{t=h}^H \Gamma_{h+1:t}^{\hat{\pi}^*} \cdot \sqrt{\frac{2\text{Var}_{s,a}(V_h^{\hat{\pi}^*})\iota_2}{N}} + 2\sqrt{\frac{H \log(HSA/\delta)}{N}} + \frac{2H^3 S \log(HSA/\delta)}{N} \right] \\
& \leq C' \left[ \sqrt{\frac{2H^3 S \log(HSA/\delta)}{N}} + 2\sqrt{\frac{H \log(HSA/\delta)}{N}} + \frac{2H^3 S \log(HSA/\delta)}{N} \right] \\
& \leq C'' \left[ \sqrt{\frac{H^3 S \log(HSA/\delta)}{N}} + \frac{H^3 S \log(HSA/\delta)}{N} \right] \\
& \leq O \left[ \sqrt{\frac{H^2 S \log(HSA/\delta)}{nd_m}} + \frac{H^2 S \log(HSA/\delta)}{nd_m} \right],
\end{aligned}$$

where the third inequality uses Lemma J.5 and the last one uses  $N \geq \frac{1}{2}nd_m$  with high probability. Similar result holds for  $\hat{Q}_h^{\pi^*} - Q_h^{\pi^*}$ . Combing those results we have reward-free bound (for any reward simultaneously)

$$O \left[ \sqrt{\frac{H^2 S \log(HSA/\delta)}{nd_m}} + \frac{H^2 S \log(HSA/\delta)}{nd_m} \right],$$

which finishes the proof of Theorem 5.4.

**Remark F.4.** Note above result is tight in both the dominate term AND the higher order term. Therefore this result cannot be further improved even in the higher order term.

<sup>14</sup>Note the use of Lemma J.10 also works for any rewards since the only high probability result they used is for  $\|P - \hat{P}\|_1$ . Therefore conditional on the concentration for  $\|P - \hat{P}\|_1$ , the argument follows for any arbitrary reward as well.

## G Discussion of Section 5

In this section we explain why Theorem 5.3 and Theorem 5.4 are optimal in the offline RL.

We begin with the offline task-agnostic setting. For the exquisite readers who check the proof of Theorem 5 of Zhang et al. [2020b], the proving procedure of their lower bound follows the standard reduction to best-arm identification in multi-armed bandit problems. More specifically, to incorporate the dependence of  $\log(K)$ , they rely on the Theorem 10 of Zhang et al. [2020b] (which is originated from Mannor and Tsitsiklis [2004]) to show in order to be  $(\epsilon, \delta)$ -correct for a problem with  $A$  arms and with  $K$  tasks, it need at least  $\Omega(\frac{A}{\epsilon^2} \log(\frac{K}{\delta}))$  samples. Such a result updates the Lemma G.1. in Yin et al. [2021b] by the extra factor  $\log(K)$  for the bandit problem with  $K$  tasks. With no modification, the rest of the proof in Section E of Yin et al. [2021b] follows though and one can end up with the lower bound  $\Omega(H^2 \log(K)/d_m \epsilon^2)$  over the problem class  $\mathcal{M}_{d_m} := \{(\mu, M) \mid \min_{t, s_t, a_t} d_t^H(s_t, a_t) \geq d_m\}$ . The case for the offline reward-free setting is also similar. Indeed, the  $\Omega(SA/\epsilon^2)$  trajectories in Lemma 4.2 in Jin et al. [2020a] could be replaced by  $\Omega(1/d_m \epsilon^2)$  by choosing some hard *near-uniform* behavior policy instances (see Section E.2 in Yin et al. [2021b]) and the rest follows since by forcing  $S$  such instances (Section 4.2 of Jin et al. [2020a]) to obtain  $\Omega(S/d_m \epsilon^2)$  and create a chain of  $\Omega(H)$  rewards for  $\Omega(H^2 S/d_m \epsilon^2)$ .

## H Proof of the linear MDP with anchor representations (Section 6)

Recall that we assume a generative oracle here. Sometimes we abuse the notation  $\mathcal{K}$  for either anchor point set or the anchor point indices set. The meaning should be clear in each context.

### H.1 Model-based Plug-in Estimator for Anchor Representations

**Step 1:** For each  $(s_k, a_k)$  where index  $k \in \mathcal{K}$ , collect  $N$  samples from  $P(\cdot | s_k, a_k)$ ; compute

$$\hat{P}_{\mathcal{K}}(s' | s_k, a_k) = \frac{\text{count}(s, a, s')}{N};$$

**Step 2:** Compute the linear combination coefficients  $\lambda_k^{s,a}$  satisfies  $\phi(s, a) = \sum_{k \in \mathcal{K}} \lambda_k^{s,a} \phi(s_k, a_k)$ ;

**Step 3:** Estimate transition distribution

$$\hat{P}(s' | s, a) = \sum_{k \in \mathcal{K}} \lambda_k^{s,a} \cdot \hat{P}_{\mathcal{K}}(s' | s_k, a_k).$$

We need to check such  $\hat{P}(s' | s, a)$  is a valid distribution. This is due to:

$$\begin{aligned} \sum_{k \in \mathcal{K}} \lambda_k^{s,a} &= \sum_{k \in \mathcal{K}} \sum_{s'} \lambda_k^{s,a} P(s' | s_k, a_k) = \sum_{s'} \sum_{k \in \mathcal{K}} \lambda_k^{s,a} P(s' | s_k, a_k) \\ &= \sum_{s'} \sum_{k \in \mathcal{K}} \lambda_k^{s,a} \langle \phi(s_k, a_k), \psi(s') \rangle = \sum_{s'} \langle \phi(s, a), \psi(s') \rangle = \sum_{s'} P(s' | s, a) = 1 \end{aligned}$$

and

$$\begin{aligned} \sum_{s'} \hat{P}(s' | s, a) &= \sum_{s'} \sum_{k \in \mathcal{K}} \lambda_k^{s,a} \hat{P}_{\mathcal{K}}(s' | s_k, a_k) = \sum_{k \in \mathcal{K}} \sum_{s'} \lambda_k^{s,a} \hat{P}_{\mathcal{K}}(s' | s_k, a_k) \\ &= \sum_{k \in \mathcal{K}} \lambda_k^{s,a} \frac{N}{N} = 1. \end{aligned}$$

**Step 4:** construct empirical model  $\widehat{M} = (S, \mathcal{A}, \widehat{P}, r, H)$  and output  $\widehat{\pi}^* = \operatorname{argmax}_{\pi} \widehat{V}_1^{\pi}$ .

Similarly, Bellman (optimality) equations hold<sup>15</sup>

$$\begin{aligned} V_t^*(s) &= \max_a \left\{ r(s, a) + \int_{s'} V_{t+1}^*(s') dP(s'|s, a) \right\}, \quad \forall s \in \mathcal{S}. \\ \widehat{V}_t^*(s) &= \max_a \left\{ r(s, a) + \int_{s'} \widehat{V}_{t+1}^*(s') d\widehat{P}(s'|s, a) \right\}, \quad \forall s \in \mathcal{S}. \end{aligned}$$

## H.2 General absorbing MDP

The definition of the general absorbing MDP remains the same: *i.e.* for a fixed state  $s$  and a sequence  $\{u_t\}_{t=1}^H$ , MDP  $M_{s, \{u_t\}_{t=1}^H}$  is identical to  $M$  for all states except  $s$ , and state  $s$  is absorbing in the sense  $P_{M_{s, \{u_t\}_{t=1}^H}}(s|s, a) = 1$  for all  $a$ , and the instantaneous reward at time  $t$  is  $r_t(s, a) = u_t$  for all  $a \in \mathcal{A}$ . Also, we use the shorthand notation  $V_{\{s, u_t\}}^\pi$  for  $V_{s, M_{s, \{u_t\}_{t=1}^H}}^\pi$  and similarly for  $Q_{\{s, u_t\}}$  and transition  $P_{\{s, u_t\}}$ . Then the following properties mirroring the Lemma B.1 and Lemma B.2 with nearly identical proof but for the integral version (which we skip):

**Lemma H.1.**

$$V_{h, \{s, u_t\}}^*(s) = \sum_{t=h}^H u_t.$$

**Lemma H.2.** Fix state  $s$ . For two different sequences  $\{u_t\}_{t=1}^H$  and  $\{u'_t\}_{t=1}^H$ , we have

$$\max_h \left\| Q_{h, \{s, u_t\}}^* - Q_{h, \{s, u'_t\}}^* \right\|_\infty \leq H \cdot \max_{t \in [H]} |u_t - u'_t|.$$

## H.3 Singleton-absorbing MDP

The well-definedness of singleton-absorbing MDP for linear MDP with anchor points depends on the following two lemmas whose proofs are still nearly identical to Lemma B.3 and Lemma B.5 which we skip.

**Lemma H.3.**  $V_t^*(s) - V_{t+1}^*(s) \geq 0$ , for all state  $s \in \mathcal{S}$  and all  $t \in [H]$ .

**Lemma H.4.** Fix a state  $s$ . If we choose  $u_t^* := V_t^*(s) - V_{t+1}^*(s) \forall t \in [H]$ , then we have the following vector form equation

$$V_{h, \{s, u_t^*\}}^* = V_{h, M}^* \quad \forall h \in [H].$$

Similarly, if we choose  $\widehat{u}_t^* := \widehat{V}_t^*(s) - \widehat{V}_{t+1}^*(s)$ , then  $\widehat{V}_{h, \{s, \widehat{u}_t^*\}}^* = \widehat{V}_{h, M}^*, \forall h \in [H]$ .

The singleton MDP we used is exactly  $M_{s, \{u_t^*\}_{t=1}^H}$  (or  $\widehat{M}_{s, \{\widehat{u}_t^*\}_{t=1}^H}$ ).

## H.4 Proof for the optimal sample complexity

For  $\widehat{\pi}^*$ , by (empirical) Bellman equation we have element-wisely:

$$\begin{aligned} \widehat{Q}_h^{\widehat{\pi}^*} - Q_h^{\widehat{\pi}^*} &= r_h + \widehat{P}^{\widehat{\pi}^*}_{h+1} \widehat{Q}_{h+1}^{\widehat{\pi}^*} - r_h - P^{\widehat{\pi}^*}_{h+1} Q_{h+1}^{\widehat{\pi}^*} \\ &= \left( \widehat{P}^{\widehat{\pi}^*}_{h+1} - P^{\widehat{\pi}^*}_{h+1} \right) \widehat{Q}_{h+1}^{\widehat{\pi}^*} + P^{\widehat{\pi}^*}_{h+1} \left( \widehat{Q}_{h+1}^{\widehat{\pi}^*} - Q_{h+1}^{\widehat{\pi}^*} \right) \\ &= \left( \widehat{P} - P \right) \widehat{V}_{h+1}^{\widehat{\pi}^*} + P^{\widehat{\pi}^*}_{h+1} \left( \widehat{Q}_{h+1}^{\widehat{\pi}^*} - Q_{h+1}^{\widehat{\pi}^*} \right) \\ &= \dots = \sum_{t=h}^H \Gamma_{h+1:t}^{\widehat{\pi}^*} \left( \widehat{P} - P \right) \widehat{V}_{t+1}^{\widehat{\pi}^*} \leq \underbrace{\sum_{t=h}^H \Gamma_{h+1:t}^{\widehat{\pi}^*} \left| \left( \widehat{P} - P \right) \widehat{V}_{t+1}^{\widehat{\pi}^*} \right|}_{(*)} \end{aligned}$$

where  $\Gamma_{h+1:t}^{\pi^*} = \prod_{i=h+1}^t P^{\pi^*}_i$  is multi-step state-action transition and  $\Gamma_{h+1:h} := I$ .

<sup>15</sup>We use the integral only to denote  $\mathcal{S}$  could be exponentially large.

## H.5 Analyzing $(\star)$

**Concentration on  $(\hat{P} - P)\hat{V}_h^\star$ .** Since  $\hat{P}$  aggregates all data from different step so that  $\hat{P}$  and  $\hat{V}_h^\star$  are on longer independent. We use the singleton-absorbing MDP  $M_{s, \{u_t^\star\}_{t=1}^H}$  to handle the case (recall  $u_t^\star := V_t^\star(s) - V_{t+1}^\star(s) \forall t \in [H]$ ). **Here, we fix the state action  $(s, a) \in \mathcal{K}$ .** Then we have:

$$\begin{aligned}
& (\hat{P}_{s,a} - P_{s,a})\hat{V}_h^\star = (\hat{P}_{s,a} - P_{s,a}) \left( \hat{V}_h^\star - \hat{V}_{h, \{s, u_t^\star\}}^\star + \hat{V}_{h, \{s, u_t^\star\}}^\star \right) \\
& = (\hat{P}_{s,a} - P_{s,a}) \left( \hat{V}_h^\star - \hat{V}_{h, \{s, u_t^\star\}}^\star \right) + (\hat{P}_{s,a} - P_{s,a}) \hat{V}_{h, \{s, u_t^\star\}}^\star \\
& \leq \left\| \hat{P}_{s,a} - P_{s,a} \right\|_1 \left\| \hat{V}_h^\star - \hat{V}_{h, \{s, u_t^\star\}}^\star \right\|_\infty + \sqrt{\frac{2 \log(4/\delta)}{N}} \sqrt{\text{Var}_{s,a}(\hat{V}_{h, \{s, u_t^\star\}}^\star)} + \frac{2H \log(1/\delta)}{3N} \\
& \leq \left\| \hat{P}_{s,a} - P_{s,a} \right\|_1 \left\| \hat{V}_h^\star - \hat{V}_{h, \{s, u_t^\star\}}^\star \right\|_\infty + \sqrt{\frac{2 \log(4/\delta)}{N}} \left( \sqrt{\text{Var}_{s,a}(\hat{V}_h^\star)} + \sqrt{\text{Var}_{s,a}(\hat{V}_{h, \{s, u_t^\star\}}^\star - \hat{V}_h^\star)} \right) + \frac{2H \log(1/\delta)}{3N} \\
& \leq \left\| \hat{P}_{s,a} - P_{s,a} \right\|_1 \left\| \hat{V}_h^\star - \hat{V}_{h, \{s, u_t^\star\}}^\star \right\|_\infty + \sqrt{\frac{2 \log(4/\delta)}{N}} \left( \sqrt{\text{Var}_{s,a}(\hat{V}_h^\star)} + \sqrt{\left\| \hat{V}_{h, \{s, u_t^\star\}}^\star - \hat{V}_h^\star \right\|_\infty^2} \right) + \frac{2H \log(1/\delta)}{3N} \\
& = \left( \left\| \hat{P}_{s,a} - P_{s,a} \right\|_1 + \sqrt{\frac{2 \log(4/\delta)}{N}} \right) \left\| \hat{V}_h^\star - \hat{V}_{h, \{s, u_t^\star\}}^\star \right\|_\infty + \sqrt{\frac{2 \log(4/\delta)}{N}} \sqrt{\text{Var}_{s,a}(\hat{V}_h^\star)} + \frac{2H \log(1/\delta)}{3N}
\end{aligned} \tag{19}$$

where the first inequality uses Bernstein inequality (Lemma J.3) (**note here  $P_{s,a}V = \int_{s'} V(s') dP(s'|s, a)$  since  $\mathcal{S}$  could be continuous space, but this does not affect the availability of Bernstein inequality!**), the second inequality uses  $\sqrt{\text{Var}(\cdot)}$  is norm (norm triangle inequality). Now we treat  $\left\| \hat{P}_{s,a} - P_{s,a} \right\|_1$  and  $\left\| \hat{V}_h^\star - \hat{V}_{h, \{s, u_t^\star\}}^\star \right\|_\infty$  separately.

**For  $\left\| \hat{P}_{s,a} - P_{s,a} \right\|_1$ .** Recall here  $(s, a) \in \mathcal{K}$ . By Lemma J.9 we obtain w.p.  $1 - \delta$

$$\left\| \hat{P}_{s,a} - P_{s,a} \right\|_1 \leq C \sqrt{\frac{|\mathcal{S}| \log(1/\delta)}{N}}. \tag{20}$$

where  $C$  absorbs the higher order term and constants.

**For  $\left\| \hat{V}_h^\star - \hat{V}_{h, \{s, u_t^\star\}}^\star \right\|_\infty$ .** Note if we set  $\hat{u}_t^\star = \hat{V}_t^\star(s) - \hat{V}_{t+1}^\star(s)$ , then by Lemma H.4

$$\hat{V}_h^\star = \hat{V}_{h, \{s, \hat{u}_t^\star\}}^\star$$

Next since  $\hat{V}_{h, \{s, \hat{u}_t^\star\}}^\star(\tilde{s}) = \max_a \hat{Q}_{h, \{s, \hat{u}_t^\star\}}^\star(\tilde{s}, a) \forall \tilde{s} \in \mathcal{S}$ , by generic inequality  $|\max f - \max g| \leq \max |f - g|$ , we have  $|\hat{V}_{h, \{s, \hat{u}_t^\star\}}^\star(\tilde{s}) - \hat{V}_{h, \{s, u_t^\star\}}^\star(\tilde{s})| \leq \max_a |\hat{Q}_{h, \{s, \hat{u}_t^\star\}}^\star(\tilde{s}, a) - \hat{Q}_{h, \{s, u_t^\star\}}^\star(\tilde{s}, a)|$ , taking  $\max_{\tilde{s}}$  on both sides, we obtain exactly

$$\left\| \hat{V}_{h, \{s, \hat{u}_t^\star\}}^\star - \hat{V}_{h, \{s, u_t^\star\}}^\star \right\|_\infty \leq \left\| \hat{Q}_{h, \{s, \hat{u}_t^\star\}}^\star - \hat{Q}_{h, \{s, u_t^\star\}}^\star \right\|_\infty$$

then by Lemma H.2,

$$\left\| \hat{V}_h^\star - \hat{V}_{h, \{s, u_t^\star\}}^\star \right\|_\infty \leq \left\| \hat{Q}_{h, \{s, \hat{u}_t^\star\}}^\star - \hat{Q}_{h, \{s, u_t^\star\}}^\star \right\|_\infty \leq H \max_t |\hat{u}_t^\star - u_t^\star|, \tag{21}$$

Recall

$$\hat{u}_t^\star - u_t^\star = \hat{V}_t^\star(s) - \hat{V}_{t+1}^\star(s) - (V_t^\star(s) - V_{t+1}^\star(s)).$$

Now we denote

$$\Delta_s := \max_t |\hat{u}_t^\star - u_t^\star| = \max_t \left| \hat{V}_t^\star(s) - \hat{V}_{t+1}^\star(s) - (V_t^\star(s) - V_{t+1}^\star(s)) \right|,$$

then  $\Delta_s$  itself is a scalar and a random variable.

To sum up, by (19), (5) and (21) and a union bound over all  $(s, a) \in \mathcal{K}$  we have

**Lemma H.5.** Fix  $N > 0$ . With probability  $1 - \delta$ , element-wisely, for all  $h \in [H]$  and all  $(s_k, a_k) \in \mathcal{K}$ ,

$$\begin{aligned} \left| \left( \widehat{P}_{s_k, a_k} - P_{s_k, a_k} \right) \widehat{V}_h^* \right| &\leq C \sqrt{\frac{|S| \log(HK/\delta)}{N}} \cdot H \max_{s_k} \Delta_{s_k} \\ &+ \sqrt{\frac{2 \log(4HK/\delta)}{N}} \sqrt{\text{Var}_{P_{s_k, a_k}}(\widehat{V}_h^*)} + \frac{2H \log(HK/\delta)}{3N} \end{aligned}$$

Now we extend Lemma H.5 to any arbitrary  $(s, a)$  by proving the following lemma:

**Lemma H.6** (recover lemma). For any function  $V$  and any state action  $(s, a)$ , we have

$$\sum_{k \in \mathcal{K}} \lambda_k^{s, a} \sqrt{\text{Var}_{P_{s_k, a_k}}(V)} \leq \sqrt{\text{Var}_{P_{s, a}}(V)}$$

*Proof of Lemma H.6.* Since  $\lambda_k^{s, a}$  are probability distributions, by Jensen's inequality twice

$$\begin{aligned} \sum_{k \in \mathcal{K}} \lambda_k^{s, a} \sqrt{\text{Var}_{P_{s_k, a_k}}(V)} &\leq \sqrt{\sum_{k \in \mathcal{K}} \lambda_k^{s, a} \text{Var}_{P_{s_k, a_k}}(V)} \\ &= \sqrt{\sum_{k \in \mathcal{K}} \lambda_k^{s, a} \text{Var}_{P_{s_k, a_k}}(V)} = \sqrt{\sum_{k \in \mathcal{K}} \lambda_k^{s, a} (P_{s_k, a_k} V^2 - (P_{s_k, a_k} V)^2)} \\ &\leq \sqrt{\sum_{k \in \mathcal{K}} \lambda_k^{s, a} \cdot P_{s_k, a_k} V^2 - \left( \sum_{k \in \mathcal{K}} \lambda_k^{s, a} P_{s_k, a_k} V \right)^2} \\ &= \sqrt{P_{s, a} V^2 - (P_{s, a} V)^2} = \sqrt{\text{Var}_{P_{s, a}}(V)}, \end{aligned}$$

where we use  $P_{s, a} = \sum_{k \in \mathcal{K}} \lambda_k^{s, a} P_{s_k, a_k}$ . ■

Therefore for all  $(s, a)$ , using Lemma H.5 and Lemma H.6 we obtain w.p.  $1 - \delta$ ,

$$\begin{aligned} \left| \left( \widehat{P}_{s, a} - P_{s, a} \right) \widehat{V}_h^* \right| &\leq \sum_{k \in \mathcal{K}} \lambda_k^{s, a} \left| \left( \widehat{P}_{s_k, a_k} - P_{s_k, a_k} \right) \widehat{V}_h^* \right| \\ &\leq C \sum_{k \in \mathcal{K}} \lambda_k^{s, a} \sqrt{\frac{S \log(HK/\delta)}{N}} \cdot H \max_{s_k} \Delta_{s_k} + \sum_{k \in \mathcal{K}} \lambda_k^{s, a} \sqrt{\frac{2 \log(4HK/\delta)}{N}} \sqrt{\text{Var}_{P_{s_k, a_k}}(\widehat{V}_h^*)} \\ &+ \sum_{k \in \mathcal{K}} \lambda_k^{s, a} \frac{2H \log(HK/\delta)}{3N} \\ &= C \sqrt{\frac{S \log(HK/\delta)}{N}} \cdot H \max_{s_k} \Delta_{s_k} + \sum_{k \in \mathcal{K}} \lambda_k^{s, a} \sqrt{\frac{2 \log(4HK/\delta)}{N}} \sqrt{\text{Var}_{P_{s_k, a_k}}(\widehat{V}_h^*)} \\ &+ \frac{2H \log(HK/\delta)}{3N} \\ &\leq C \sqrt{\frac{S \log(HK/\delta)}{N}} \cdot H \max_{s_k} \Delta_{s_k} + \sqrt{\frac{2 \log(4HK/\delta)}{N}} \sqrt{\text{Var}_{P_{s, a}}(\widehat{V}_h^*)} + \frac{2H \log(HK/\delta)}{3N} \end{aligned}$$

Now plug above back into (\*), we receive:

$$\begin{aligned} &\left| \widehat{Q}_h^{\widehat{\pi}^*} - Q_h^{\widehat{\pi}^*} \right| \\ &\leq \sum_{t=h}^H \Gamma_{h+1:t}^{\widehat{\pi}^*} \left( C \sqrt{\frac{S \log(HK/\delta)}{N}} \cdot H \max_{s_k} \Delta_{s_k} \cdot \mathbf{1} + \sqrt{\frac{2 \log(4HK/\delta)}{N}} \sqrt{\text{Var}_P(\widehat{V}_{t+1}^*)} + \frac{2H \log(HK/\delta)}{3N} \cdot \mathbf{1} \right) \\ &\leq \sum_{t=h}^H \Gamma_{h+1:t}^{\widehat{\pi}^*} \sqrt{\frac{2 \log(4HK/\delta)}{N}} \sqrt{\text{Var}_P(\widehat{V}_{t+1}^*)} + CH^2 \sqrt{\frac{S \log(HK/\delta)}{N}} \cdot \max_s \Delta_s \cdot \mathbf{1} + \frac{2H^2 \log(HK/\delta)}{3N} \cdot \mathbf{1} \end{aligned}$$

Similar to before, we get

$$\sqrt{\text{Var}_P(\widehat{V}_h^*)} := \sqrt{\text{Var}_P(\widehat{V}_h^*)} \leq \sqrt{\text{Var}_P(V_h^*)} + \|\widehat{Q}_h^* - Q_h^*\|_\infty \quad (22)$$

Plug (22) back to above we obtain  $\forall h \in [H]$ ,

$$\begin{aligned} \left| \widehat{Q}_h^* - Q_h^* \right| &\leq \sqrt{\frac{2 \log(4HK/\delta)}{N}} \sum_{t=h}^H \Gamma_{h+1:t}^{\widehat{\pi}^*} \left( \sqrt{\text{Var}_P(V_{t+1}^*)} + \|\widehat{Q}_{t+1}^* - Q_{t+1}^*\|_\infty \right) \\ &+ CH^2 \sqrt{\frac{S \log(HK/\delta)}{N}} \cdot \max_{s_k} \Delta_{s_k} \cdot \mathbf{1} + \frac{2H^2 \log(HK/\delta)}{3N} \cdot \mathbf{1} \\ &\leq \sqrt{\frac{2 \log(4HK/\delta)}{N}} \sum_{t=h}^H \Gamma_{h+1:t}^{\widehat{\pi}^*} \sqrt{\text{Var}_P(V_{t+1}^*)} + \sqrt{\frac{2 \log(4HK/\delta)}{N}} \sum_{t=h}^H \|\widehat{Q}_{t+1}^* - Q_{t+1}^*\|_\infty \\ &+ CH^2 \sqrt{\frac{S \log(HK/\delta)}{N}} \cdot \max_{s_k} \Delta_{s_k} \cdot \mathbf{1} + \frac{2H^2 \log(HK/\delta)}{3N} \cdot \mathbf{1} \end{aligned} \quad (23)$$

Apply Lemma J.5 and the (anchor version using recover lemma H.6) coarse uniform bound (Lemma J.10) we obtain the following lemma:

**Lemma H.7.** *With probability  $1 - \delta$ , for all  $h \in [H]$ ,*

$$\|\widehat{Q}_h^* - Q_h^*\|_\infty \leq \sqrt{\frac{C_0 H^3 \log(4HK/\delta)}{N}} + \sqrt{\frac{2 \log(4HK/\delta)}{N}} \sum_{t=h}^H \|\widehat{Q}_{t+1}^* - Q_{t+1}^*\|_\infty + C' H^4 \frac{S \log(HK/\delta)}{N}$$

*Proof.* Since

$$\begin{aligned} \Delta_{s_k} &:= \max_t |\hat{u}_t^* - u_t^*| = \max_t \left| \widehat{V}_t^*(s_k) - \widehat{V}_{t+1}^*(s_k) - (V_t^*(s_k) - V_{t+1}^*(s_k)) \right| \\ &\leq 2 \cdot \max_t \left| \widehat{V}_t^*(s_k) - V_t^*(s_k) \right| \\ &= 2 \cdot \max_t \left| \max_\pi \widehat{V}_t^\pi(s_k) - \max_\pi V_t^\pi(s_k) \right| \\ &\leq 2 \cdot \max_{\pi \in \Pi_g, t \in [H]} \left\| \widehat{V}_t^\pi - V_t^\pi \right\|_\infty \leq C \cdot H^2 \sqrt{\frac{|\mathcal{S}| \log(HK/\delta)}{N}} \end{aligned} \quad (24)$$

where the last inequality uses (the anchor version) of Lemma J.10.<sup>16</sup> Then apply union bound w.p.  $1 - \delta/2$ , we obtain  $\max_{s_k} \Delta_{s_k} \leq C \cdot H^2 \sqrt{\frac{|\mathcal{S}| \log(HK/\delta)}{N}}$ . Note (23) holds with probability  $1 - \delta/2$ , therefore plug above into (23) and uses Lemma J.5 and take  $\|\cdot\|_\infty$  we obtain w.p.  $1 - \delta$ , the result holds.  $\blacksquare$

**Lemma H.8.** *Given  $N > 0$ . Define  $C'' := 2 \cdot \max(\sqrt{C_0}, C')$  where  $C'$  is the universal constant in Lemma H.7. When  $N \geq 8H^2 |\mathcal{S}| \log(4HK/\delta)$ , then with probability  $1 - \delta$ ,  $\forall h \in [H]$ ,*

$$\begin{aligned} \|\widehat{Q}_h^* - Q_h^*\|_\infty &\leq C'' \sqrt{\frac{H^3 \log(4HK/\delta)}{N}} + C'' \frac{H^4 S \log(HK/\delta)}{N}. \\ \|\widehat{Q}_h^* - Q_h^*\|_\infty &\leq C'' \sqrt{\frac{H^3 \log(4HK/\delta)}{N}} + C'' \frac{H^4 S \log(HK/\delta)}{N}. \end{aligned} \quad (25)$$

*Proof.* The proof is the same as Lemma B.9.  $\blacksquare$

**Remark H.9.** *Note the higher order term has dependence  $H^4 S$ . Use the same self-bounding trick, we can reduce it to  $H^{3.5} S^{0.5}$ .*

<sup>16</sup>Here the anchor version means for any  $(s, a)$  we can apply  $\|\widehat{P}_{s,a} - P_{s,a}\|_1 = \|\sum_k \lambda_k^{s,a} (\widehat{P}_{s,a} - P_{s,a})\|_1 \leq \sum_k \lambda_k^{s,a} \|\widehat{P}_{s,a} - P_{s,a}\|_1$ .

**Lemma H.10.** Given  $N > 0$ . There exists universal constants  $C_1, C_2$  such that when  $N \geq C_1 H^2 |\mathcal{S}| \log(HK/\delta)$ , then with probability  $1 - \delta$ ,  $\forall h \in [H]$ ,

$$\left\| \widehat{Q}_h^{\pi^*} - Q_h^{\pi^*} \right\|_{\infty} \leq C_2 \sqrt{\frac{H^3 \log(HK/\delta)}{N}} + C_2 \frac{H^3 \sqrt{HS} \log(HK/\delta)}{N}. \quad (26)$$

and

$$\left\| \widehat{Q}_h^{\pi^*} - Q_h^{\pi^*} \right\|_{\infty} \leq C_2 \sqrt{\frac{H^3 \log(HK/\delta)}{N}} + C_2 \frac{H^3 \sqrt{HS} \log(HK/\delta)}{N}.$$

*Proof.* The proof is similar to Lemma B.11. ■

## H.6 Proof of Theorem 6.2

*Proof.* By the direct computing of the suboptimality,

$$Q_1^* - Q_1^{\pi^*} = Q_1^* - \widehat{Q}_1^{\pi^*} + \widehat{Q}_1^{\pi^*} - \widehat{Q}_1^{\pi^*} + \widehat{Q}_1^{\pi^*} - Q_1^{\pi^*} \leq |Q_1^* - \widehat{Q}_1^{\pi^*}| + |\widehat{Q}_1^{\pi^*} - Q_1^{\pi^*}|,$$

then by Lemma H.10 we can finish the proof. ■

## H.7 Take-away in the linear MDP with anchor setting.

Under the setting  $S$  could be exponential large,  $\mathcal{A}$  could be infinite (or even continuous space), with anchor representations ( $K \ll |\mathcal{S}|$ ), our Theorem 6.2 has order  $\widetilde{O}(\sqrt{H^3/N})$  when  $N$  is sufficiently large. This translate to  $N = \widetilde{O}(H^3/\epsilon^2)$  and the total sample used is  $KN = \widetilde{O}(KH^3/\epsilon^2)$ . This improves the total complexity  $\widetilde{O}(KH^4/\epsilon^2)$  in Cui and Yang [2020] and is optimal.

## I The computational efficiency for the model-based offline plug-in estimators

For completeness, we discuss the computational and storage aspect of our model-based method. Its computational cost is  $\widetilde{O}(H^4/d_m \epsilon^2)$  for computing  $\widehat{P}$ , the same as its sample complexity in steps ( $H$  steps is an episode), and running value iteration causes  $O(HS^2A)$  time (here we assume the bit complexity  $L(P, r, H) = 1$ , see Agarwal et al. [2019] Section 1.3). The total computational complexity is  $\widetilde{O}(H^4/d_m \epsilon^2) + O(HS^2A)$ . The memory cost is  $O(HS^2A)$ .

## J Assisting lemmas

**Lemma J.1** (Multiplicative Chernoff bound Chernoff et al. [1952]). *Let  $X$  be a Binomial random variable with parameter  $p, n$ . For any  $1 \geq \theta > 0$ , we have that*

$$\mathbb{P}[X < (1 - \theta)pn] < e^{-\frac{\theta^2 pn}{2}}. \quad \text{and} \quad \mathbb{P}[X \geq (1 + \theta)pn] < e^{-\frac{\theta^2 pn}{3}}$$

**Lemma J.2** (Hoeffding's Inequality Sridharan [2002]). *Let  $x_1, \dots, x_n$  be independent bounded random variables such that  $\mathbb{E}[x_i] = 0$  and  $|x_i| \leq \xi_i$  with probability 1. Then for any  $\epsilon > 0$  we have*

$$\mathbb{P}\left(\frac{1}{n} \sum_{i=1}^n x_i \geq \epsilon\right) \leq e^{-\frac{2n^2 \epsilon^2}{\sum_{i=1}^n \xi_i^2}}.$$

**Lemma J.3** (Bernstein's Inequality). *Let  $x_1, \dots, x_n$  be independent bounded random variables such that  $\mathbb{E}[x_i] = 0$  and  $|x_i| \leq \xi$  with probability 1. Let  $\sigma^2 = \frac{1}{n} \sum_{i=1}^n \text{Var}[x_i]$ , then with probability  $1 - \delta$  we have*

$$\frac{1}{n} \sum_{i=1}^n x_i \leq \sqrt{\frac{2\sigma^2 \cdot \log(1/\delta)}{n}} + \frac{2\xi}{3n} \log(1/\delta)$$



**Lemma J.4** (Freedman's inequality Tropp et al. [2011]). *Let  $X$  be the martingale associated with a filter  $\mathcal{F}$  (i.e.  $X_i = \mathbb{E}[X|\mathcal{F}_i]$ ) satisfying  $|X_i - X_{i-1}| \leq M$  for  $i = 1, \dots, n$ . Denote  $W := \sum_{i=1}^n \text{Var}(X_i|\mathcal{F}_{i-1})$  then we have*

$$\mathbb{P}(|X - \mathbb{E}[X]| \geq \epsilon, W \leq \sigma^2) \leq 2e^{-\frac{\epsilon^2}{2(\sigma^2 + M\epsilon/3)}}.$$

Or in other words, with probability  $1 - \delta$ ,

$$|X - \mathbb{E}[X]| \leq \sqrt{8\sigma^2 \cdot \log(1/\delta)} + \frac{2M}{3} \cdot \log(1/\delta), \quad \text{Or } W \geq \sigma^2.$$

**Lemma J.5** (Sum of expectation of conditional variance of value; Lemma F.3 of Yin et al. [2021a]).

$$\begin{aligned} & \text{Var}_\pi \left[ \sum_{t=h}^H r_t^{(1)} \mid s_h^{(1)} = s_h, a_h^{(1)} = a_h \right] \\ &= \sum_{t=h}^H \left( \mathbb{E}_\pi \left[ \text{Var} \left[ r_t^{(1)} + V_{t+1}^\pi \left( s_{t+1}^{(1)} \mid s_t^{(1)}, a_t^{(1)} \right) \mid s_h^{(1)} = s_h, a_h^{(1)} = a_h \right] \right. \right. \\ & \quad \left. \left. + \mathbb{E}_\pi \left[ \text{Var} \left[ \mathbb{E} \left[ r_t^{(1)} + V_{t+1}^\pi \left( s_{t+1}^{(1)} \mid s_t^{(1)}, a_t^{(1)} \right) \mid s_t^{(1)} \right] \mid s_h^{(1)} = s_h, a_h^{(1)} = a_h \right] \right] \right) \end{aligned}$$

By apply above, one can show

$$\sum_{t=h}^H \Gamma_{h+1:t}^\pi \sqrt{\text{Var}_P(V_{t+1}^\pi)} \leq \sqrt{(H-h)^3} \cdot \mathbf{1}.$$

**Remark J.6.** *The infinite horizon discounted setting counterpart result is  $(I - \gamma P^\pi)^{-1} \sigma_{V^\pi} \leq (1 - \gamma)^{-3/2}$ .*

### J.1 Minimax rate of discrete distributions under $l_1$ loss.

This Section provides the minimax rate for  $\|\hat{P} - P\|_1$  for any model-based algorithms and is based on Han et al. [2015]. Let  $P$  be  $S$  dimensional distribution.

**Lemma J.7** (Minimax lower bound for  $\|\hat{P} - P\|_1$ ). *Let  $n$  be the number of data-points sampled from  $P$ . If  $n > \frac{e}{32}S$ , then there exists a constant  $p > 0$ , such that*

$$\inf_{\hat{P}} \sup_{P \in \mathcal{M}_S} \mathbb{P} \left[ \|\hat{P} - P\|_1 \geq \frac{1}{8} \sqrt{\frac{eS}{2n}} - o(e^{-n}) - o(e^{-S}) \right] \geq p,$$

where  $\mathcal{M}_S$  denotes the set of distributions with support size  $S$  and the infimum is taken over **ALL** estimators.

**Remark J.8.** *Note the  $\hat{P}$  in above carries over all estimators but not just empirical estimator. This provides the minimax result.*

*Proof.* The proof comes from Theorem 2 of Han et al. [2015], where we pick  $\zeta = 1$ . Note they establish the minimax result for  $\mathbb{E}_P \|\hat{P} - P\|_1$ . However, by a simple contradiction we can get the above. Indeed, suppose

$$\inf_{\hat{P}} \sup_{P \in \mathcal{M}_S} \mathbb{P} \left[ \|\hat{P} - P\|_1 < \frac{1}{8} \sqrt{\frac{eS}{2n}} - o(e^{-n}) - o(e^{-S}) \right] = 1,$$

then this implies  $\inf_{\hat{P}} \sup_{P \in \mathcal{M}_S} \mathbb{E}_P \|\hat{P} - P\|_1 < \frac{1}{8} \sqrt{\frac{eS}{2n}} - o(e^{-n}) - o(e^{-S})$  which contradicts Theorem 2 of Han et al. [2015].  $\blacksquare$

**Lemma J.9** (Upper bound for  $\|\hat{P} - P\|_1$ ). *Let  $n$  be the number of data-points sampled from  $P$ . Then with probability  $1 - \delta$*

$$\|\hat{P} - P\|_1 \leq C \left( \sqrt{\frac{S \log(S/\delta)}{n}} + \frac{S \log(S/\delta)}{n} \right)$$

for any  $P \in \mathcal{M}_S$ . Here  $\hat{P}$  is the empirical (MLE) estimator.

*Proof.* First fix a state  $s$ . Let  $X_i = \mathbf{1}[s_i = s]$ , then  $X_i \sim \text{Bern}(p_s(1 - p_s))$  and  $X_s = \sum_{i=1}^n X_i \sim \text{Binomial}(n, p_s)$ . By Bernstein inequality,

$$\left| \frac{X_s}{n} - P_s \right| \leq \sqrt{\frac{2p_s(1 - p_s) \log(1/\delta)}{n}} + \frac{3}{n} \log(1/\delta)$$

Apply a union bound we obtain w.p.  $1 - \delta$

$$\left| \frac{X_s}{n} - P_s \right| \leq \sqrt{\frac{2p_s(1 - p_s) \log(S/\delta)}{n}} + \frac{3}{n} \log(S/\delta) \quad \forall s \in \mathcal{S}$$

which implies

$$\begin{aligned} \|\hat{P} - P\|_1 &= \sum_{s \in \mathcal{S}} \left| \frac{X_s}{n} - P_s \right| \\ &\leq \sum_{s \in \mathcal{S}} \sqrt{\frac{2p_s(1 - p_s) \log(S/\delta)}{n}} + \frac{3S}{n} \log(S/\delta) \\ &= \sqrt{\frac{1}{n}} \sum_{s \in \mathcal{S}} \frac{1}{S} \cdot \sqrt{2S^2 p_s(1 - p_s) \log(S/\delta)} + \frac{3S}{n} \log(S/\delta) \\ &\leq \sqrt{\frac{1}{n}} \sqrt{2S^2 \cdot \frac{\sum_{s \in \mathcal{S}} p_s}{S} \left(1 - \frac{\sum_{s \in \mathcal{S}} p_s}{S}\right) \log(S/\delta)} + \frac{3S}{n} \log(S/\delta) \\ &= \sqrt{\frac{2(S-1) \log(S/\delta)}{n}} + \frac{3S}{n} \log(S/\delta). \end{aligned}$$

where the last inequality uses the concavity of  $\sqrt{x(1-x)}$ .

Finally, we can absorb the higher order term using the mild condition  $n > c \cdot S \log(S/\delta)$ .  $\blacksquare$

## J.2 A crude uniform convergence bound

Here we provide a crude bound for  $\sup_{\pi \in \Pi_g} \|\hat{V}_1^\pi - V_1^\pi\|_\infty$ , which is the finite horizon counterpart of Section 2.2 of Jiang [2018] and is a form of simulation lemma.

**Lemma J.10** (Crude bound by Simulation Lemma). *Fix  $N > 0$  to be number of samples for each coordinates. Recall  $\Pi_g$  is the global policy class. Then w.p.  $1 - \delta$ ,*

$$\sup_{\pi \in \Pi_g, h \in [H]} \left\| \hat{Q}_h^\pi - Q_h^\pi \right\|_\infty \leq C \cdot H^2 \sqrt{\frac{S \log(SA/\delta)}{N}},$$

which further implies

$$\sup_{\pi \in \Pi_g, h \in [H]} \left\| \hat{V}_h^\pi - V_h^\pi \right\|_\infty \leq C \cdot H^2 \sqrt{\frac{S \log(SA/\delta)}{N}},$$

*Proof.*

$$\begin{aligned}
\widehat{Q}_h^\pi - Q_h^\pi &= r_h + \widehat{P}^{\pi_{h+1}} \widehat{Q}_{h+1}^\pi - r_h - P^{\pi_{h+1}} Q_{h+1}^\pi \\
&= \left( \widehat{P}^{\pi_{h+1}} - P^{\pi_{h+1}} \right) \widehat{Q}_{h+1}^\pi + P^{\pi_{h+1}} \left( Q_{h+1}^\pi - Q_{h+1}^\pi \right) \\
&= \left( \widehat{P} - P \right) \widehat{V}_{h+1}^\pi + P^{\pi_{h+1}} \left( \widehat{Q}_{h+1}^\pi - Q_{h+1}^\pi \right) \\
&= \dots = \sum_{t=h}^H \Gamma_{h+1:t}^\pi \left( \widehat{P} - P \right) \widehat{V}_{t+1}^\pi \\
&\leq \sum_{t=h}^H \Gamma_{h+1:t}^\pi \left| \left( \widehat{P} - P \right) \widehat{V}_{t+1}^\pi \right| \\
&\leq \sum_{t=h}^H 1 \cdot \max_{s,a} \left\| \left( \widehat{P} - P \right) (\cdot | s, a) \right\|_1 \cdot \left\| \widehat{V}_{t+1}^\pi \right\|_\infty \cdot \mathbf{1} \\
&\leq H^2 \cdot \max_{s,a} \left\| \left( \widehat{P} - P \right) (\cdot | s, a) \right\|_1 \cdot \mathbf{1} \leq C \cdot H^2 \sqrt{\frac{S \log(SA/\delta)}{N}} \mathbf{1}
\end{aligned}$$

with probability  $1 - \delta$ , where the last inequality is by Lemma J.9. By symmetry and taking the  $\|\cdot\|_\infty$ , we obtain w.p.  $1 - \delta$

$$\sup_{\pi \in \Pi_g, h \in [H]} \left\| \widehat{Q}_h^\pi - Q_h^\pi \right\|_\infty \leq C \cdot H^2 \sqrt{\frac{S \log(SA/\delta)}{N}}.$$

The above holds for  $\forall \pi \in \Pi_g$  since Lemma J.9 acts on  $\left\| \widehat{P} - P \right\|_1$  and is irrelevant to  $\pi$ . ■
